## RNA degradation sculpts the maternal transcriptome during *Drosophila* oogenesis

Patrick Blatt<sup>1</sup>, Siu Wah Wong-Deyrup<sup>1</sup>, Alicia McCarthy<sup>1,2</sup>, Shane Breznak<sup>1</sup>, Matthew D. Hurton<sup>3</sup>, Maitreyi Upadhyay<sup>1,4</sup>, Benjamin Bennink<sup>1</sup>, Justin Camacho<sup>1</sup>, Miler T. Lee<sup>\*3</sup>, Prashanth Rangan<sup>\*1</sup>

<sup>1</sup>University at Albany, Department of Biological Sciences, RNA Institute; 1400 Washington Avenue, LSRB 2033D, Albany, NY 12222

<sup>2</sup>10x Genomics, Inc., 6230 Stoneridge Mall Road, Pleasanton, CA, 94588

<sup>3</sup>University of Pittsburgh, Department of Biological Sciences; 4249 Fifth Avenue, Pittsburgh, PA 15260

<sup>4</sup>Department of Stem Cell and Regenerative Biology, Sherman Fairchild 100, Harvard University, 7 Divinity Avenue, Cambridge, MA 02138

\*Co-Corresponding authors: [miler@pitt.edu](mailto:miler@pitt.edu) & [prangan@albany.edu](mailto:prangan@albany.edu)

### Abstract

In sexually reproducing animals, the oocyte contributes a large supply of RNAs that are essential to launch development upon fertilization. The mechanisms that regulate the composition of the maternal RNA contribution during oogenesis are unclear. Here, we show that a subset of RNAs expressed during the early stages of oogenesis is subjected to regulated degradation during oocyte specification. Failure to remove these RNAs results in oocyte dysfunction and death. We identify the RNA-degrading Super Killer complex and No-Go Decay factor Pelota as key regulators of oogenesis via targeted clearance of RNAs expressed in germline stem cells. These regulators target RNAs enriched for cytidine sequences bound by the protein Half pint. Thus, RNA degradation helps orchestrate a germ cell-to-maternal transition by sculpting the maternal RNA contribution to the zygote.

### Report

A fertilized egg is totipotent, having the unique potential to differentiate into every cell lineage in the adult organism<sup>1-3</sup>. Across animals, 40-75% of genes are deposited into the egg during oogenesis as part of the maternal RNA contribution required for embryo development<sup>4-6</sup>. It is unlikely that every RNA synthesized during oogenesis is destined for the maternal contribution: RNAs that support oogenesis-specific functions, such as germline stem cell (GSC) self-renewal and differentiation, could be detrimental during embryogenesis. It is not known if such oogenesis-specific RNAs are targeted for elimination or what, if any, mechanisms ensure that only the appropriate RNAs are deposited into the oocyte.

In *Drosophila*, oogenesis occurs in ovarioles composed of germaria, which contain the GSCs and the GSC daughter cells (cystoblasts, CB) that progressively differentiate into 16-cell cysts (Figure 1A)<sup>7-11</sup>. In each cyst, the oocyte receives RNA and protein contributions from the remaining 15 nurse cells (Figure 1A'), thus causing the oocyte to enlarge forming egg chambers (Figure 1A)<sup>12-18</sup>. In a screen to identify novel regulators of this process, we discovered that a component of the RNA-degradation-promoting Super Killer (Ski) complex (Figure 1B), Super Killer 2 (Ski2), called Twister (Tst) in *Drosophila*, is required for egg chamber growth and female fertility (Figure S1A)<sup>19-22</sup>. Wild type (WT) *Drosophila* ovarioles stained for Vasa (germ cells) and for 1B1 (somatic cell membranes) show the progression from the germarium to successively larger egg chambers (Figure 1C). In contrast, egg chambers failed to grow in *tst* mutant ovarioles (Figure 1C-D, 1M) as well as upon germline RNAi depletion of *tst* (*nanos-GAL4* >RNAi, Figure 1E-F, 1M) but not when *tst* was depleted in the soma (*traffic jam-GAL4* >RNAi, S1B-C)<sup>23,24</sup>. However, *tst* mutant flies are otherwise viable, and successful oogenesis and egg production were restored in *tst* mutants by expressing Tst protein in the germline alone (Figure 1G-H, 1M, S1A). Egg chambers

51 lacking *tst* expressed cleaved Caspase 3 at putative stages 6-7, suggesting that they undergo  
52 apoptosis (Figure S1D-E).

53  
54 The Ski complex, in addition to RNA helicase SKI2, consists of the scaffolding subunits SKI3 and  
55 SKI8, which are coupled to the exosome complex by SKI7 (Figure 1B)<sup>20,21,25,26</sup>. We found that *ski3*  
56 (*CG8777*) mutant and germline depletion of *ski3* and *ski8* (*CG3909*) phenocopied *tst* mutants  
57 (Figure 1I-M, S1F-H). HBS1 is thought to fulfill the role of SKI7 in *Drosophila*; however, female  
58 *hbs1* mutants were previously found to be fertile, suggesting that SKI7/HBS1 is dispensable for  
59 Ski complex function in the female germline or acts redundantly with a yet-unidentified protein<sup>27-</sup>  
60 <sup>29</sup>. Overall, we conclude that the Ski complex components Ski2, Ski3 and Ski8 are required in the  
61 fly germ line for oogenesis.

62  
63 Given the role of the Ski complex in exosome-mediated RNA degradation, we hypothesized that  
64 Tst promotes degradation of RNAs during oogenesis<sup>21,30,31</sup>. RNA sequencing (RNA-seq) revealed  
65 296 genes upregulated in ovaries lacking *tst* (Figure 2A, Supplemental Table 1). These include  
66 207 genes such as *blanks* and actin 57B (*act57B*) with >4-fold higher levels in a germline *tst RNAi*  
67 compared to WT (Figure 2B), which likely represent transcripts regulated by Tst in the germline.  
68 To determine that the depletion of *tst* resulted in a defect in post-transcriptional regulation, we  
69 measured pre-mRNA levels of select Tst-regulated RNAs by qRT-PCR and indeed found no  
70 significant difference between WT and *tst* germline RNAi flies (Figure S2A). Taken together, these  
71 data suggest that *tst* promotes the post-transcriptional degradation of a distinct group of RNAs  
72 during oogenesis.

73  
74 To determine when Tst acts, we used RNA-seq to profile the expression of Tst-regulated RNAs  
75 in ovaries across a time course of oocyte development: GSCs, CBs, and cysts, which were each  
76 enriched using mutants (see Methods); germaria and early egg chambers were enriched using  
77 young WT ovaries; late-stage egg chambers were enriched using adult WT ovaries; and  
78 unfertilized eggs, which represent the maternal contribution<sup>9,11,32-34</sup>. Principal component analysis  
79 revealed that *tst* mutant and *tst RNAi* ovaries more closely resemble WT as compared to  
80 undifferentiated stages, suggesting that *tst* is required after differentiation (Figure S2B). Indeed,  
81 compared to non-targets, Tst-regulated RNAs decreased at the cyst stages and were nearly  
82 absent as part of the maternal contribution in the egg (Figure 2C, S2C-D). *In situ* hybridization of  
83 the Tst-regulated RNAs *blanks* and *act57B* demonstrates low levels beginning in the cyst stages  
84 in WT, in contrast to persistence throughout the egg chambers in *tst* germline RNAi (Figure 2D-  
85 G'). To precisely determine when Tst-regulated RNAs are degraded, we probed for proteins  
86 encoded by Tst-regulated RNAs *blanks* and *actins*. In WT, both Blanks and nuclear-Actins  
87 (detected by C4 staining) were highly expressed in GSCs and CBs but their expression is  
88 attenuated in the cysts, when the oocyte is specified, consistent with previous reports (Figure 2H-  
89 M)<sup>35-38</sup>. In contrast, both Blanks and nuclear-Actin expression persisted in the cysts and egg  
90 chambers of *tst* germline RNAi flies (Figure 2H-M). We did not find gross changes to cytoplasmic  
91 Actin pool upon the loss of *tst*, as measured by Phalloidin staining (Figure S2E-F')<sup>39</sup>. Overall, our  
92 data suggest that Tst attenuates the levels of Blanks and Actin proteins by degrading their mRNAs  
93 before oocyte specification.

94  
95 To investigate how specific transcripts are targeted by Tst, we considered the contribution of RNA  
96 surveillance pathways, which are known to direct RNAs to the Ski complex for degradation<sup>40</sup>.  
97 Nonsense mediated decay (NMD) and non-stop decay (NSD) are unlikely to be involved. In  
98 contrast to *tst*, *ski3* and *ski8* germline RNAi flies, germline mutant clones of the NMD pathway  
99 components *up-frameshift 1* (*Upf1*), *Upf2*, and *Upf3* do produce eggs, albeit with patterning  
100 defects<sup>41</sup>. We additionally looked for features in the RNAs that could trigger NMD or NSD. Most  
101 Tst-regulated RNAs do not encode introns in their 3' untranslated regions (3' UTR) (Figure S3A),

102 nor show any evidence for aberrant splicing that would give rise to premature termination codons  
103 (Figure S3B), ruling out NMD<sup>42-44</sup>. NSD is triggered by ribosome read through into the 3' UTR, but  
104 all Tst-regulated RNAs are annotated transcripts that encode stop codons suggesting that NSD  
105 is also not involved<sup>45-47</sup>.

106  
107 However, we did find evidence that no-go decay (NGD), which is activated when ribosomes stall  
108 on RNAs, was involved in the degradation of Tst-regulated RNAs. Pelota (Pelo/DOM34) is a  
109 critical effector protein of the NGD pathway that promotes recycling of stalled ribosomes on  
110 mRNAs<sup>27,48,49</sup>. Intriguingly, *pelo* mutants, like *tst* mutants, are homozygous viable but female  
111 sterile, and this role is germline specific<sup>50</sup>. *pelo* mutant egg chambers failed to grow and died mid-  
112 oogenesis, phenocopying *tst* mutant ovaries (Figure 3A-C). In addition, *pelo* mutants also lost  
113 GSCs, as previously described (Figure S3C-D)<sup>50</sup>. To test if *pelo* and *tst* co-regulate target RNAs,  
114 we performed RNA-seq on *pelo* mutant ovaries and found that 81% of genes upregulated upon  
115 the loss of *tst* were also upregulated >2-fold in *pelo* mutants, including *act57B*, though not *blanks*  
116 (168/207, Figure 3D). These data suggest that *pelo*, a key component of the NGD pathway,  
117 promotes the degradation of a large fraction of Tst-regulated RNAs.

118  
119 To observe the translation dynamics of Tst-regulated RNAs, we purified polysomes from ovaries  
120 enriched for different stages of oocyte development and performed RNA-seq (Figure 3E-G). Adult  
121 WT ovaries overall show proportional RNA-seq read depth in the polysome fraction (y-axis)  
122 compared to total RNA (x-axis), with Tst-regulated RNAs recapitulating the low expression we  
123 observed previously (Figure 3E). In undifferentiated CBs, where Tst-regulated RNA levels are  
124 higher, we observed weak polysome association (Figure 3F, J), but overall these RNAs appear  
125 to be translated; this is consistent with detection of Blanks protein in CBs prior to oocyte  
126 specification (Figure 2H-H'). In the differentiating cysts, polysome association appears to increase  
127 (Figure 3G, J); however, we did not observe Blanks protein in WT cysts and egg chambers (Figure  
128 2H-H'), suggesting that ribosome engagement of these Tst-regulated RNAs is not productive.  
129 Although increased association with ribosomes is usually linked to increased RNA stability, Tst-  
130 regulated RNAs showed an increased association with ribosomes concomitant with their  
131 degradation (Figure 3E-G, J)<sup>51</sup>. This change in polysome association is not seen for non-targets  
132 (Figure S3E). These results suggest ribosomes are stalled on Tst-regulated RNAs prior to their  
133 degradation.

134  
135 As DOM34 (*pelo*) promotes recycling of stalled ribosomes, and SKI2 is both required to extract  
136 RNAs from stalled ribosomes and to promote their degradation, we predicted that Tst-regulated  
137 RNAs would be associated with polysomes but not degraded in the later stages of oogenesis in  
138 *tst* and *pelo* mutants<sup>52-54</sup>. Indeed, we found that Tst-regulated RNA abundance was substantially  
139 increased in *tst* and *pelo* mutant ovaries compared to developmentally similar WT ovaries, and  
140 that these RNAs are associated with ribosomes (Figure 3H-J). Taken together, we find that Tst-  
141 regulated RNAs have increased association with ribosomes prior to their degradation and are  
142 regulated by the NGD pathway member *pelo*.

143  
144 Pelo-mediated degradation can be activated by features in the coding sequence that cause  
145 ribosome stalling, such as sub-optimal codons<sup>55,56</sup>. We found that Tst-regulated RNAs in fact  
146 have an elevated codon optimality compared to non-targets, as measured by the Codon  
147 Adaptation Index (CAI), suggesting sub-optimal codon frequency does not trigger degradation of  
148 Tst-regulated RNAs (Figure S4A)<sup>57,58</sup>. Instead, we found an enrichment of repeating, interspaced  
149 cytidine residues in the coding sequence (CDS), but not in the 5'UTRs or 3'UTRs, of Tst-regulated  
150 RNAs (Figure 4A), suggesting cytidine tracts might recruit Tst. To investigate this hypothesis, we  
151 compared three actin paralogs (*act42A*, *act57B* and *act87E*), which were upregulated upon the

152 loss of *tst*, to a fourth, *act5C*, which was not upregulated. The *actin* coding sequences are highly  
153 similar (>84% nucleotide identity) and have similar CAIs (Fig S4B). However, a multiple sequence  
154 alignment revealed a repeating cytidine tract in the codon wobble position of *act42A*, *act57B* and  
155 *act87E* that is interrupted by purines in the non Tst-target *act5C* (Figure 4B).

156  
157 To evaluate the effect of these sequence differences *in vivo*, we built reporters with the GFP open  
158 reading frame fused to the CDS of non-target *act5C* and target *act57B*, as well as a version of  
159 *act57B* with cytidine tracts mutated to match *act5C* (PT-mutant). We expressed these reporters  
160 under the control of the maternal germline promoter *pgc*, as well as the 3'UTR of *nos*, and 5'UTR  
161 of *K10* (Figure S4C-C''), which are not translationally repressed<sup>32,59-61</sup>. Levels of *act5C-GFP* did  
162 not significantly change during oocyte specification or upon loss of *tst* (Figure 4C-D', H). In  
163 contrast, the levels of *act57B-GFP* were significantly reduced in WT cysts compared to  
164 undifferentiated cells (Figure 4E-E', H); we note that the reporter was re-expressed in the egg  
165 chambers, which could arise from the strong maternal germline promoter or additional layers of  
166 control on Tst-regulated RNAs. Strikingly, upon germline depletion of *tst*, the levels of *act57B-*  
167 *GFP* were strongly elevated in cysts (Figure 4E-F', H). Expression of *act57B PT Mutant-GFP* was  
168 significantly higher in cysts compared to that of *act57B-GFP* (Figure 4G-H), matching *act5C-GFP*  
169 and demonstrating the importance of the cytidine tract in promoting destabilization of Tst-  
170 regulated RNAs during the cyst stages.

171  
172 To identify the factor that recruits Tst to these cytidine tracts, we looked for polypyrimidine tract  
173 binding proteins (PTBs) expressed during oogenesis, and found two: *hephaetus* (*heph*) and *half*  
174 *pint* (*hfp*), the homolog of human PUF60. While loss of *heph* did not phenocopy *pelo* and *tst*, loss  
175 of *hfp* partially phenocopied the oogenesis defects of *pelo* and *tst* (Figure 4I-K)<sup>62,63</sup>. Consistent  
176 with previous reports, we found that Hfp is present in the nucleus, where it has been shown to  
177 regulate splicing and we also observed it in the cytoplasm, suggesting it can affect RNA stability  
178 as well as translation (Figure S4D-E)<sup>63</sup>. To determine if Hfp preferentially binds to the cytidine  
179 tracts found in Tst-regulated RNAs, we performed Electrophoretic Mobility Shift Assays (EMSA)  
180 using a recombinant protein composed of the two N-terminal RNA Recognition Motifs (RRM) of  
181 Hfp, which dimerize on a denaturing gel (Figure S4F-G). We observed that the Hfp RRM bound  
182 the *act57B* PT more efficiently than the *act5C* PT sequence (Figure 4L). To determine if Hfp bound  
183 to Tst-regulated RNAs *in vivo*, we immunoprecipitated Hfp from young WT ovaries followed by  
184 qRT-PCR. We found that the Tst-regulated RNA *act57B* was robustly associated with Hfp,  
185 whereas the non-targets *polar granule component* (*pgc*) and *act5C* were not (Figure S4H). Lastly,  
186 to determine if Hfp also co-regulates Tst-regulated RNAs, we performed RNA-seq of *hfp* mutant  
187 ovaries. We found that 70% of the RNAs upregulated in *tst*-depleted ovaries were also  
188 upregulated >2-fold in *hfp* mutants, including *act57B*, *act42A* and *act87E* (144/207, Figure 4M),  
189 whereas *act5C* was not upregulated in either mutant. We did not observe splicing defects of Tst-  
190 regulated RNAs in *hfp* mutants, ruling out mis-splicing as the reason for their upregulation (Figure  
191 S4I). Taken together, our data suggest that Hfp binding to a subset of Tst-regulated RNAs can  
192 elicit their degradation mediated by both *Pelo* and Tst by presumably modulating ribosome  
193 association.

194  
195 Having elucidated the mechanisms underlying how Tst-regulated RNAs are recognized for  
196 degradation, we sought to determine how correct temporal regulation of these RNAs contributes  
197 to oogenesis. We first assessed the functions of Tst-regulated RNAs prior to their degradation.  
198 Individual depletion of 6 out of 50 Tst-regulated RNAs we tested using germline-specific RNAi  
199 resulted in germline defects, including a complete loss of the germline (Supplemental Table 2)  
200 (Figure S5A-E). Finally, to elucidate why ectopic persistence of Tst-regulated RNAs interferes  
201 with later oogenesis, we examined *tst* mutants for hallmarks of oogenesis defects. We did not find  
202 any changes in differentiation or nurse-cell endocycling (Figure S6A-F)<sup>11,17,64-67</sup>. However, we did



203 observe that Egalitarian (Egl), a protein required to transport the maternal RNA contribution to the  
204 oocyte, always localized to the oocyte in WT but in *tst*, *pelo* and *hfp* mutants, while Egl initially  
205 localized to the oocyte, this localization was not maintained in later egg chambers (Figure S6G-  
206 J')<sup>13,68</sup>. This suggests that targeted RNA degradation is required for proper inheritance of the  
207 maternal contribution, which is necessary for oocyte specification. Thus, some Tst-regulated  
208 RNAs play critical roles in germ stem cell maintenance, but are detrimental to the transition to a  
209 mature oocyte.

210  
211 In conclusion, we find that specific RNAs expressed during the undifferentiated stages of  
212 oogenesis are degraded during oocyte specification preventing them from being inherited as part  
213 of the maternal contribution mediated by the NGD components Pelo and Tst (Figure 4N). Aberrant  
214 persistence of these RNAs results in loss of oocyte maintenance and death of egg chambers.  
215 This suggests that precise curation of the maternal contribution is tightly coupled to successful  
216 egg production. Based on our observations, we propose that a germ cell-to-maternal transition  
217 (GMT) occurs during oocyte specification. We speculate that the GMT exists to enable both the  
218 transition from germ cell to oocyte identity and the accrual of the maternal RNA contribution to  
219 the embryo. After fertilization, the maternal contribution is subsequently cleared during the oocyte-  
220 to-embryo and maternal-to-zygotic transitions (MZT) to promote a zygotic identity<sup>69-71</sup>. Thus, RNA  
221 degradation bookends an oocyte's fate, regulating both its initiation and termination.

222

## 223 **Materials and Methods:**

224

### 225 **Fly lines**

226 Flies were grown at 25°C and dissected between 1-3 days post-eclosion. The following RNAi  
227 stocks were used in this study: *tst RNAi* (Bloomington #55647), *CG8777 RNAi* (Ski3, VDRC  
228 #v100948), *CG3909 RNAi* (Ski8, VDRC #12758), *bam RNAi* (Bloomington #33631), *UAS-Tkv*  
229 (Bloomington #35653), *bam RNAi; hs-bam*<sup>33</sup>. The following tissue-specific drivers were used in  
230 this study: *UAS-Dcr2;nosGAL4* (Bloomington #25751), *UAS-Dcr2;nosGAL4;bamGFP*,  
231 *If/CyO;nosGAL4* (Lehmann Lab) *nosGAL4;MKRS/TM6* (Bloomington #4442), and *tjGAL4/CyO*  
232 (Lehmann Lab)<sup>23</sup>. The following stocks were used in this study: *y<sup>1</sup>w<sup>1118</sup>P{ry[+t7.2]=70FLP}3F*  
233 (Bloomington #6420), *w<sup>1118</sup>;M{ET1}tst<sup>MB10212</sup>/TM6C,Sb1* (Bloomington #29100), *hfp<sup>9</sup>,cu/TM2*  
234 (Schüpbach Lab), *M{UAS-hfp.ORF.3xHA}ZH-86Fb* (FlyORF, F000989), *CG8777<sup>M102824</sup>/CyO*  
235 (Bloomington #35904), *w[1118];Df(2R)ED1770,P{w[+mW.Scer\FRT.hs3]=3'.RS5+3.3'}*  
236 *ED1770/SM6a* (Bloomington #9157), *w[1118]; Df(3R)Exel9013/TM6B, Tb[1]* (Bloomington  
237 #7991), *pelo<sup>1</sup>/CyO* (Bloomington #11757).

238

### 239 **Genotypes used to enrich specific stages of germline:**

240 Germline Stem Cells: *nosGAL4>UAS-Tkv* (Bloomington #35653)<sup>9,32,72</sup>. Cystoblasts:  
241 *nosGAL4>bam RNAi* (Bloomington #33631)<sup>11,64,65</sup>. Differentiating Cysts: *nosGAL4>bam RNAi*;  
242 *hs-bam*<sup>33</sup>. Female flies were heat shocked at 37° C for 2 hours, incubated at room temperature  
243 for 4 hours and heat shocked again for 2 hours. This was subsequently repeated the next day  
244 and flies were dissected. Young Wild Type: *y<sup>1</sup>w<sup>1118</sup>P{ry[+t7.2]=70FLP}3F* (Bloomington #6420).  
245 Female flies were collected and dissected within 2 hours of eclosion.

246

### 247 **Dissection and Immunostaining**

248 Flies were dissected in 1X PBS and samples were fixed for 10 minutes in 5% methanol-free  
249 formaldehyde<sup>32</sup>. Ovary samples were washed in 1 mL PBT (1X PBS, 0.5% Triton X-100, 0.3%  
250 BSA) 4 times for 7 minutes each. Primary antibodies were added in PBT and incubated at 4°C  
251 rotating overnight. Samples were washed 4 times for 7 minutes each in 1 mL PBT, and once in 1  
252 mL PBT with 2% donkey serum (Sigma) for 15 minutes. Secondary antibodies were added in PBT

253 with 4% donkey serum and incubated at room temperature for 2 hours. Samples were washed 4  
254 times for 7 minutes each in 1 mL of 1X PBST (0.2% Tween 20 in 1x PBS) and incubated in  
255 Vectashield with DAPI (Vector Laboratories) for 30 minutes before mounting. The following  
256 primary antibodies were used: Mouse anti-1B1 (1:20, DSHB), Rabbit anti-Vasa (1:1000, Rangan  
257 Lab), Chicken anti-Vasa (1:1000), Rabbit anti-GFP (1:2000, Abcam, ab6556), Rabbit anti-Blanks  
258 (1:1000, Sontheimer Lab), Mouse anti-Actin C4 (Sigma, MAB1501), Rabbit anti-Cleaved  
259 Caspase3 (1:300, Cell Signaling #96615), Rabbit anti-Egl (1:1000, Lehmann Lab), Alexa 488-  
260 Conjugated Phalloidin (Cell Signaling #8878), Mouse anti-Hfp (1:25, Schüpbach Lab)<sup>35,37,73,74</sup>. The  
261 following secondary antibodies were used: Alexa 488 (Molecular Probes), Cy3, and Cy5 (Jackson  
262 Labs) were used at a dilution of 1:500.

263

### 264 **Fluorescence Imaging**

265 The ovary tissue samples were visualized under 10X dry, 20X dry and 40X oil objective lenses  
266 and images were acquired using a Zeiss LSM-710 confocal microscope. Confocal images were  
267 processed with ImageJ. A.U. The images were quantified using ImageJ with the Measurement  
268 function.

269

### 270 **Generation of Transgenic Flies**

271 The pCasper2 plasmid containing the *pgc* promoter, *nos* 5'UTR, eGFP CDS and K10 3'UTR was  
272 used as a backbone to generate Actin-GFP reporter constructs<sup>32</sup>. gBlocks (IDT) of the *actin5C*,  
273 *actin57B* and *actin57B* PT-Mutant CDSs were individually cloned upstream of GFP by digesting  
274 with SpeI (NEB, R0133S). Constructs were ligated through Gibson Assembly (NEB, E2611S),  
275 utilizing complementary overhangs between the CDS fragment and the pCasper2 backbone.  
276 Injection of these plasmids into *Drosophila* embryos was conducted by BestGene Inc.

277

### 278 **Gateway Cloning**

279 The coding sequence of Tst was PCR amplified from cDNA to include flanking attB sites. BP  
280 recombination was carried out according to the manufacturer's protocol using equimolar amounts  
281 (100 fmol) of the attB-PCR product and the pDONR entry clone plasmid (Invitrogen, 12535-019).  
282 Components were incubated in TE buffer with BP Clonase enzyme mix and reaction buffer at  
283 25°C for one hour. 2 µg/µL Proteinase K was added to the reaction and incubated at 37°C for one  
284 hour. Plasmid was then transformed into DH5α competent cells and plated on LB-Kan plates at  
285 37°C overnight (Thermo, 18265017). Cells of individual colony samples were propagated and  
286 plasmid was purified. LR recombination reaction was performed with the pPPW and pPGW  
287 destination vectors (Gateway Collection). Components were incubated in TE buffer with LR  
288 Clonase enzyme mix and reaction buffer at 25°C for one hour. 2 µg/µL Proteinase K was added  
289 to the reaction and incubated at 37°C for one hour. Plasmid was then transformed into XL10-Gold  
290 competent cells and plated on LB-Kan plates at 37°C overnight (Integrated Sciences, 200315).  
291 Cells of individual colony samples were propagated, plasmid was purified and sequenced to verify  
292 insertion.

293

### 294 **RNA Isolation**

295 Ovaries were dissected in 1X PBS and homogenized in 50uL of TRIzol (Invitrogen, 15596026)<sup>32</sup>.  
296 RNA was isolated by adding an additional 950 uL of TRIzol and 230uL of Chloroform with mixing.  
297 Samples were centrifuged at 13,000 rpm, 4°C for 15 minutes. Aqueous phase was transferred to  
298 a new tube, nucleic acids were precipitated using 1 mL of 100% ethanol, 52 µL of 3M Sodium  
299 Acetate and precipitated for >1 hour at -20°C. Samples were centrifuged at 13,000 rpm, 4°C for  
300 20 minutes. Ethanol was decanted, pellet was washed with 70% ethanol and dried at room  
301 temperature for 10 minutes. Pellet was dissolved in 20 µL RNase free water and placed in a 42°C  
302 water bath for 10 minutes. Concentration of nucleic acid samples were measured on a  
303 spectrophotometer and treated with DNase (TURBO DNA-free Kit, Life Technologies, AM1907).

304  
305  
306  
307  
308  
309  
310  
311  
312  
313

### Quantitative Real Time-PCR (qRT-PCR)

1  $\mu$ L of cDNA was amplified using 5 $\mu$ L of SYBR green Master Mix, 0.3  $\mu$ L of 10 $\mu$ M of each reverse and forward primers in a 10  $\mu$ L reaction<sup>32</sup>. The thermal cycling conditions consisted of 50°C for 2 minutes, 95°C for 10 minutes, 40 cycles at 95°C for 15 seconds, and 60°C for 60 seconds. The experiments were carried out in technical triplicate and minimum 2 biological replicates for each sample. *rp49* gene was utilized as a control. To calculate fold change in mRNA levels to *rp49* mRNA levels, average of the 2 <sup>$\Delta$</sup> Ct for the biological replicates was calculated. Error bars were plotted using standard error of the ratios. P-value was determined by Students t-test.

314

### RNAseq library preparation

Total RNA samples were run on a 1% agarose gel to assess sample integrity<sup>75</sup>. To generate mRNA-Seq libraries, total RNA was incubated with poly(A) selection beads. mRNA enriched sequencing libraries were made with the NEXTflex Rapid Directional RNAseq Kit (BioO Scientific Corp.) and corresponding protocol. mRNA was fragmented at 95°C for 13 minutes to achieve ~300 bp fragments. 75 bp single-end (or paired-end as specified) mRNA sequencing was performed each sample with an Illumina NextSeq500, carried out by the Center for Functional Genomics (CFG).

322

### RNA-seq analysis

Sequenced reads were aligned to the *D. melanogaster* genome (UCSCdm6 and FlyBase R6.01) using HISAT2 v2.0.5<sup>76</sup>. Unambiguously mapping reads RefSeq annotated mRNA and lincRNA were quantified using featureCounts v1.5.1 default parameters<sup>77</sup>. Genes with  $\geq 0.5$  reads per million (RPM) in one of WT ovaries, *tst* mutant ovaries, *tst RNAi* ovaries, or young ovaries were retained for further analysis (N=9251 genes). Tst regulated mRNAs were classified as genes whose transcript-per-million (TPM) expression levels were  $>4$ -fold increased in the *tst RNAi* samples; a subset of these that are additionally  $>2$ -fold increased in the *tst* mutant samples were considered to be strong Tst regulated mRNAs (N=207 genes). To curate a set of non-target genes to serve as a background set, we identified genes that differed  $<1.25$  fold between WT and *tst RNAi* and selected the 3 non-targets with the most similar *tst RNAi* expression level to each Tst regulated mRNA, to yield a set of 621 non-targets. For polysome profiling samples, normalized ribosome occupancy was calculated as  $\log_2(\text{polysome TPM} / \text{input TPM})$ . To compare ribosome occupancy of Tst regulated mRNAs across different conditions relative to the global differences observed, we normalized Tst regulated mRNA ribosome occupancy by mean non-target occupancy, i.e.  $\log_2((\text{polysome\_target TPM}) / (\text{input\_target TPM}) / \text{average}(\text{polysome\_non-target TPM} / \text{input\_non-target TPM}))$ . Codon optimality index (CAI) was calculated for each gene relative to the codon frequencies in the top 100 expressed genes in WT ovaries according to Sharp & Li, 1987<sup>57</sup>.

342

### EdU

Ovaries were dissected into Schneider's Media and incubated in 10 $\mu$ M EdU solution (Click-iT EdU Flow Cytometry Assay Kit) rotating for one hour<sup>78</sup>. Samples were fixed in 3.7% formaldehyde in PBS, rotating for 30 minutes. Fixative was then aspirated and samples were washed with 1 mL PBS for 10 minutes and permeabilized in 1 mL of permeabilization solution (1% Triton X-100 in PBST) rotating for 20 minutes. Samples were then washed in 1 mL PBS rotating for 10 minutes. Click-iT reaction cocktail (PBS, CuSO<sub>4</sub>, Fluorescent dye azide and Reaction Buffer Additive) was made according to manufacturer's directions and added to each sample. Tubes were protected from light and rotated at room temperature for 30 minutes. Samples were then washed once with 1 mL of Click-iT reaction rinse buffer and once with 1 mL PBS. Ovary samples were then transitioned to the immunostaining protocol.

353

354  
355  
356  
357  
358  
359  
360  
361  
362  
363  
364  
365  
366  
367  
368  
369

### Fluorescent *in situ* Hybridization

Ovaries were dissected in RNase free 1X PBS and fixed in 1 mL of 5% formaldehyde rotating for 10 minutes. Samples were then washed three times for five minutes each in PT buffer (PBS, 0.1% Triton X-100) and dehydrated in successive methanol washes for six minutes each (30%, 50%, 70%). A final 100% methanol wash was carried out for 12 minutes. Samples were equilibrated to PT buffer by conducting successive methanol washes for six minutes each (70%, 50%, 30%), followed by three PT washes of six minutes each. Ovaries were pre-hybridized for six minutes in 1 mL Wash buffer (10% Deionized Formamide, 2X SSC in RNase Free H<sub>2</sub>O). Alexa-488 fluorescent probe against *pgc* was generated by Stellaris. Hybridization of probes was conducted at 32°C, covered for >16 hours. Samples were then washed six times in Wash buffer for 2 minutes per wash. Samples were then washed twice in 1 mL Wash buffer for 30 minutes at 30°C. Wash buffer was aspirated and incubated in Vectashield for 30 minutes before mounting. *in situ* experiments were repeated more than three times for control and experimental ovaries.

### RNAScope™ Assay

We utilized a modified RNAScope procedure for *Drosophila* ovaries described previously<sup>79</sup>. Probes were designed and generated by Advanced Cell Diagnostics with specificity to target base pairs 29-1250 of *blanks* mRNA (accession number from NCBI: NM\_139709.2), base pairs 1196-1693 of *actin57B* mRNA (NM\_079076.4). Ovaries were dissected in RNase free 1X PBS and fixed in 1 mL of 5% formaldehyde rotating for 10 minutes. Samples were then washed three times for five minutes each in PT buffer (PBS, 0.1% Triton X-100) and dehydrated in successive methanol washes for six minutes each (30%, 50%, 70%). A final 100% methanol wash was carried out for 12 minutes. Samples were equilibrated to PT buffer by conducting successive methanol washes for six minutes each (70%, 50%, 30%), followed by three PT washes of six minutes each. Ovaries were pre-hybridized for six minutes in 1 mL of RNAScope Wash buffer (ACD, 310091). Hybridization of probes was conducted at 40°C, covered for >16 hours. Samples were then washed three times in RNAScope wash buffer for 5 minutes per wash, fixed in 4% formaldehyde in 1X PBS at room temperature for 10 minutes and washed in buffer three times for 5 minutes each. Ovaries were incubated in a successive series of amplifier solutions (Amp). Amp 1 for at least 45 minutes at 40°C, Amp 2 for 45 minutes at 40°C, Amp 3 for 45 minutes at 40°C, Amp 4 for 45 minutes at 40°C. After each Amp step ovaries were washed in wash buffer 5 times for 3 minutes each at room temperature. Samples were then washed in 1 mL PBT for 5 minutes and mounted in Vectashield. RNAScope experiments were repeated more than three times for control and *tst RNAi* ovaries.

### Materials and reagents

Fly food was made according to previously published procedures, and filled narrow vials (Fisherbrand *Drosophila* Vials; Fischer Scientific) to approximately 12mL<sup>32</sup>.

### RNA Immuno-Precipitation (RIP)

65 pairs of ovaries were dissected in 1X PBS<sup>32</sup>. After dissection, PBS was aspirated and 100 µl of RIPA buffer (50 mM Tris pH 8.0, 1% Triton X-100, 0.1% sodium deoxycholate, 0.1% SDS, 140 mM NaCl, 1mM EDTA, 1 mM PMSF, 1 protease inhibitor pill per 50 ml) was added and the sample was homogenized. An additional 200 µl of RIPA buffer was added to the lysate and mixed. The lysate was then centrifuged at 13,000 rpm for 10 minutes at 4°C. The supernatant was transferred to a new tube. 10% of the cleared homogenate was set aside as input, 4X SDS buffer was added the sample was heated at 95°C for 5 minutes and stored at -20°C until Western analysis. An additional 10% of homogenate was used for RNA input, 100 µl of TriZol was added, mixed and this sample was stored in -80°C. 40% of homogenate was used for the IgG control and the remaining 40% was used for RIP. The following antibodies were added to the lysate and incubated



405 at 4°C for 3 hours; 1 µl of Rabbit anti-HA (abcam, 9110), 1 µl of ChromePure Rabbit IgG (Jackson  
406 ImmunoResearch Labs). Protein A Dynabeads (Thermo Fisher Scientific) were separated into 15  
407 µl aliquots for each sample and washed four times in 400 µl of 1:10 diluted protease inhibitor-  
408 containing Net2 buffer (50 mM Tris-Cl [pH 8.0], 150 mM NaCl, 10% NP-40) on a magnetic rack.  
409 The beads were then re-suspended in 100 µl of Net2 buffer. After lysate incubation 25 µl of  
410 washed beads was added to each sample and incubated overnight at 4°C. Beads were washed  
411 six times with 500 µl of 1:10 diluted Net2 buffer for 2 minutes each. Beads were then resuspended  
412 in 25 µl of Net2 buffer. An aliquot of 10 µl was used for Western Blot analysis. The remaining 15  
413 µl was used for RNA extraction.

414

### 415 **Protein Purification**

416 The coding sequence of two adjacent RRM of Hfp (Amino acids 110-326) was PCR amplified  
417 from cDNA to incorporate Nco1 and Kpn1 sites and ligated into the pETM-82 expression plasmid  
418 via Gibson assembly (NEB)<sup>32</sup>. The completed plasmid was transformed into Rosetta BL21 cells  
419 (Millipore Sigma, 70954-3). A starter culture of 5 ml of Rosetta BL21 cells containing the  
420 completed plasmid were grown overnight at 37°C in LB with Kanamycin. This culture was then  
421 added to 1000 mL of LB-Kan media. Cells were shaken at 220 rpm at 37°C for 3 hours until  
422 OD600 ~0.6. To induce protein expression, 0.5 mM IPTG was added to the culture and then  
423 shaken at 220 rpm at 37°C for 3 hours. The cells were then centrifuged at 4000xg for 20 minutes  
424 at 4°C in 50 mL aliquots. The pellet was re-suspended in 3 mL of re-suspension buffer (20 mM  
425 Na phosphate, 50 mM NaCl, 20 mM imidazole, 10 ul of 500 mg/ml pH 7.4), sonicated on ice at  
426 20% intensity for 20 seconds for 3 pulses using 1/8-inch probe. The suspension was then  
427 centrifuged at 10,000xg for 10 minutes at 4°C. The column (His GraviTrap, GE Cat#11-0033-99)  
428 was equilibrated with 10 mL binding buffer (20 mM Na phosphate, 50 mM NaCl, 20 mM imidazole,  
429 10 ul of 500 mg/mL pH 7.4). The supernatant was added to the column and washed with  
430 increments of 1 mL, 4 mL and 5 mL of binding buffer. The protein was then eluted using the  
431 following washes; twice with 1 mL of elution buffer #1, twice with 1 mL of elution buffer #2 and  
432 three times with 1 mL of elution buffer #3. Elution Buffer #1: 20 mM NaPO<sub>4</sub>, 50 mM NaCl, 150  
433 mM imidazole, pH 7.4 Elution Buffer #2: 20 mM NaPO<sub>4</sub>, 50 mM NaCl, 300 mM imidazole, pH 7.4  
434 Elution Buffer #3: 20 mM NaPO<sub>4</sub>, 50 mM NaCl, 500 mM imidazole, pH 7.4 The first elution  
435 contained purified Hfp RRM protein. The eluted protein was de-salted using the PD-10 column  
436 (GE #17-0851-01). The column was equilibrated with 25mL of binding buffer (10 mM HEPES, 150  
437 mM KCl, pH 7.5) and centrifuged at 3500 rpm for 2 minutes. The eluted protein was slowly added  
438 to the column and centrifuged at 3500 rpm for 2 minutes. Desalted protein concentration was  
439 determined by Bradford assay. The eluted protein was then stored in 20% glycerol at -80°C until  
440 use.

441

### 442 **Electrophoretic Mobility Shift Assay (EMSA)**

443 Positive control oligo: 5'-UUUUUCUCUU-3', negative control scramble: 5'-UACGUACGUA-3',  
444 *act5C* sequence: 5'-UCUUCCCCAUC-3', *act57B* sequence: 5'-UCUUCCCCUC-3' RNA  
445 oligonucleotides were end-labeled using T4 Kinase (NEB) with ATP [ $\gamma$ -<sup>32</sup>P]<sup>32</sup>. Excess ATP was  
446 removed through G-25 Sephadix Columns (Roche, 11273990001). RNA-binding reactions were  
447 performed in 1X Binding Buffer (50mM Tris pH 7.5, 150mM NaCl, 2mM DTT, 0.1mg/µl BSA,  
448 0.001% Tween-20, 0.5µl of dIdC, 1µl RNaseOUT and 0.5µl of yeast t-RNA)<sup>80</sup>. 3.0 nM of RNA  
449 oligo and 3.6µM purified Hfp RRM protein was incubated for 20 minutes at RT and then ran on  
450 an 3.5% native polyacrylamide TBE gel at 150V for 4 hours at 4°C. The gel was then dried onto  
451 Whatmann filter paper for one hour and exposed to a phosphor screen overnight. A Typhoon Trio  
452 imager was used to image the phosphor screen.

453

### 454 **Subcellular Fractionation**

455 50 adult Wild Type ovaries were dissected in 1X PBS and homogenized with 10-20 strokes of a  
456 plastic homogenizer in 100  $\mu$ L hypotonic lysis buffer (10mM HEPES pH 7.9, 1.5 mM MgCl<sub>2</sub>, 10  
457 mM KCl, 0.5 mM DTT). Homogenate was incubated on ice for 15 minutes. 50  $\mu$ L of homogenate  
458 was aliquoted in a new tube, 4X SDS buffer was added, sample was boiled at 95°C for 5 minutes  
459 and stored in -20°C until use as total homogenate. The remaining homogenate was centrifuged  
460 for 10 minutes at 1000g. 50  $\mu$ L of supernatant was collected 4X SDS buffer was added, sample  
461 was boiled at 95°C for 5 minutes and stored in -20°C until use as cytoplasmic fraction. The pellet  
462 was resuspended in high salt extraction buffer (20mM HEPES pH 7.9, 25% glycerol, 420 mM  
463 NaCl, 1.5 mM MgCl<sub>2</sub>, 0.2 mM EDTA, 0.5 mM DTT) and centrifuged for 5 minutes at 20,000g.  
464 Supernatant was collected 4X SDS buffer was added, sample was boiled at 95°C for 5 minutes  
465 and stored in -20°C until use as total nuclear fraction.

#### 466 467 **Western Blot**

468 Twenty wild-type size ovaries or 40 mutant size ovaries were dissected in 1X PBS<sup>32</sup>. After  
469 dissection, PBS was aspirated and 30  $\mu$ L of NP-40 buffer with protease inhibitors added to the  
470 tissue and homogenized. The lysate was centrifuged at 13,000 rpm for 15 minutes at 4°C.  
471 Aqueous layer was transferred into a new tube while avoiding the top lipid layer. 1  $\mu$ L of the protein  
472 extract was used to carry out a Bradford (Bio-Rad, 500-0205) assay. 25  $\mu$ g of protein was  
473 denatured with 4X Laemmli Sample Buffer (Bio-Rad, 161-0747) and  $\beta$ -mercaptoethanol at 95°C for  
474 5 minutes. The samples were loaded in a Mini-PROTEAN TGX 4-20% gradient SDS-PAGE gels  
475 (Bio-Rad, 456-1094) and run at 110V for 1 hour. The proteins were then transferred to a 0.20  $\mu$ m  
476 nitrocellulose membrane at 100V for 1 hour at 4°C. After transfer, the membrane was blocked in  
477 5% milk in PBST for 2 hours at RT. The following antibodies were used: Mouse anti-Hfp (1:1000,  
478 Schüpbach Lab), Rabbit anti-Orb (1:1000, Lehmann Lab), Rabbit anti-His (1:000, Rockland Inc.,  
479 600-401-382), Mouse anti-Fibrillarin (1:25, DSHB). Primary antibody was prepared in 5% milk in  
480 PBST was added to the membrane and incubated at 4°C overnight. The membrane was then  
481 washed three times in 0.5% milk PBST. Anti-Rabbit HRP (1:10,000, Abcam, ab97046) or Anti-  
482 Mouse HRP (1:10,000, Abcam, ab6721) was prepared in 5% milk in PBST, and was added to the  
483 membrane and incubated at room temperature for 2 hours. The membrane was then washed 3  
484 times in PBST. Bio-rad chemiluminescence ECL kit (1705061) was used to image the membrane.

#### 485 486 **Egg Laying Assay**

487 Newly eclosed flies were collected and fattened overnight on yeast. Assays were conducted in  
488 cages on apple juice plates containing 6 control or experimental females crossed to 4 Wild Type  
489 control males. Cages were maintained at 25°C and plates changed daily for counting. Analyses  
490 were performed on three consecutive days. Total number of eggs laid was counted and averaged.  
491 Both control and experimental experiments were conducted in triplicate.

#### 492 493 **Polysome profiling and Polysome-Seq**

494 30 Wild Type or 150 experimental ovary pairs were dissected in 1X PBS and immediately flash  
495 frozen on liquid nitrogen<sup>32,81</sup>. Samples were homogenized in lysis buffer and 20% of lysate was  
496 used as input for mRNA isolation and library preparation (as described above). Samples were  
497 loaded onto 10-45% CHX supplemented sucrose gradients in 9/16 x 3.5 PA tubes (Beckman  
498 Coulter, #331372) and spun at 35,000 x g in SW41 for 3 hours at 4°C. Gradients were fractionated  
499 with a Density Gradient Fractionation System (#621140007). RNA was extracted using acid  
500 phenol-chloroform and precipitated overnight. Pelleted RNA was resuspended in 20  $\mu$ L water,  
501 treated with TURBO DNase and libraries were prepared as described above.

#### 502 503 **MEME Analyses**

504 The 5'UTR, CDS, 3'UTR and full transcript sequences of all 207 Tst-regulated target genes were  
505 individually analyzed by the MEME algorithm<sup>82</sup>. Classic mode analysis was utilized to conduct *de*  
506 *novo* motif search with default parameters as well as Any Number of Repetitions (anr) mode.  
507 Discriminative mode analysis was conducted against 621 non-target gene sequences as  
508 background with default parameters. Motif logos, number of sites, and p-values all reported as  
509 produced by output of the program.

510

### 511 **Acknowledgements**

512 We would like to thank all members of the Rangan Lab as well as Dr. Sano H, Juliano C, Belfort  
513 M, and Farrell J for discussion and comments on the manuscript. We would also like to thank the  
514 Schüpbach Lab for the Hfp antibody and mutant flies, the Sontheimer Lab for the Blanks antibody,  
515 and the Newbury Lab for flies and reagents. P.R. is funded by the NIH/NIGMS (R01GM111779-  
516 06). P.B. is funded by NIH (grant 1F31GM126784-01) and by the RNA Institute. M.T.L. was  
517 supported by start-up funds from the Univ. of Pittsburgh.

518

### 519 **References:**

520

- 521 1. Cinalli, R. M., Rangan, P. & Lehmann, R. Germ cells are forever. *Cell* **132**, 559–562  
522 (2008).
- 523 2. Seydoux, G. & Braun, R. E. Pathway to Totipotency: Lessons from Germ Cells. *Cell* **127**,  
524 891–904 (2006).
- 525 3. Reik, W. & Surani, M. A. Germline and Pluripotent Stem Cells. *Cold Spring Harbor*  
526 *Perspectives in Biology* **7**, (2015).
- 527 4. Walser, C. B. & Lipshitz, H. D. Transcript clearance during the maternal-to-zygotic  
528 transition. *Current Opinion in Genetics & Development* **21**, 431–443 (2011).
- 529 5. Laver, J. D., Marsolais, A. J., Smibert, C. A. & Lipshitz, H. D. Regulation and Function of  
530 Maternal Gene Products During the Maternal-to-Zygotic Transition in *Drosophila*. *Current*  
531 *topics in developmental biology* **113**, 43–84 (2015).
- 532 6. Lee, M. T., Bonneau, A. R. & Giraldez, A. J. Zygotic Genome Activation During the  
533 Maternal-to-Zygotic Transition. *Annu. Rev. Cell Dev. Biol.* **30**, 581–613 (2014).
- 534 7. Lehmann, R. Germline stem cells: Origin and destiny. *Cell Stem Cell* **10**, 729–739 (2012).
- 535 8. Spradling, A. C. *et al.* The *Drosophila* germarium: stem cells, germ line cysts, and  
536 oocytes. *Cold Spring Harbor Symposia on Quantitative Biology* **62**, 25–34 (1997).
- 537 9. Xie, T. & Spradling, A. C. decapentaplegic is essential for the maintenance and division  
538 of germline stem cells in the *Drosophila* ovary. *Cell* **94**, 251–260 (1998).
- 539 10. Spradling, A., Drummond-Barbosa, D. & Kai, T. Stem cells find their niche. *Nature* **414**,  
540 98–104 (2001).
- 541 11. McKearin, D. M. & Spradling, A. C. bag-of-marbles: a *Drosophila* gene required to initiate  
542 both male and female gametogenesis. *Genes & Development* **4**, 2242–2251 (1990).
- 543 12. Eichhorn, S. W. *et al.* mRNA poly(A)-tail changes specified by deadenylation broadly  
544 reshape translation in *Drosophila* oocytes and early embryos. *eLife* **5**, 1–24 (2016).
- 545 13. Navarro, C., Puthalakath, H., Adams, J. M., Strasser, A. & Lehmann, R. Egalitarian binds  
546 dynein light chain to establish oocyte polarity and maintain oocyte fate. *Nat Cell Biol* **6**,  
547 427–435 (2004).
- 548 14. Huynh, J.-R. & St Johnston, D. The origin of asymmetry: early polarisation of the  
549 *Drosophila* germline cyst and oocyte. *Current Biology* **14**, R438–49 (2004).
- 550 15. Lantz, V., Chang, J. S., Horabin, J. I., Bopp, D. & Schedl, P. The *Drosophila* orb RNA-  
551 binding protein is required for the formation of the egg chamber and establishment of  
552 polarity. *Genes & Development* **8**, 598–613 (1994).
- 553 16. Kugler, J.-M. & Lasko, P. Localization, anchoring and translational control of oskar,  
554 gurken, bicoid and nanos mRNA during *drosophila* oogenesis. *Fly* **3**, 15–28 (2009).

- 555 17. Spradling, A. C. & Mahowald, A. P. Amplification of genes for chorion proteins during  
556 oogenesis in *Drosophila melanogaster*. *Proc. Natl Acad. Sci. USA*  
557 **77**, 1096 (1980).
- 558 18. Navarro-Costa, P. *et al.* Early programming of the oocyte epigenome temporally controls  
559 late prophase I transcription and chromatin remodelling. *Nat Commun* **7**, (2016).
- 560 19. Seago, J. E., Chernukhin, I. V. & Newbury, S. F. The *Drosophila* gene *twister*, an  
561 orthologue of the yeast helicase SKI2, is differentially expressed during development.  
562 *Mechanisms of Development* **106**, 137–141 (2001).
- 563 20. Anderson, J. S. & Parker, R. P. The 3' to 5' degradation of yeast mRNAs is a general  
564 mechanism for mRNA turnover that requires the SKI2 DEVH box protein and 3' to 5'  
565 exonucleases of the exosome complex. *Embo J* **17**, 1497–1506 (1998).
- 566 21. Halbach, F., Rode, M. & Conti, E. The crystal structure of *S. cerevisiae* Ski2, a DEXH  
567 helicase associated with the cytoplasmic functions of the exosome. *RNA* **18**, 124–134  
568 (2012).
- 569 22. Schmidt, C. *et al.* The cryo-EM structure of a ribosome–Ski2–Ski3–Ski8 helicase complex.  
570 *Science* **354**, 1431–1433 (2016).
- 571 23. Tanentzapf, G., Devenport, D., Godt, D. & Brown, N. H. Integrin-dependent anchoring of  
572 a stem-cell niche. *Nat Cell Biol* **9**, 1413–1418 (2007).
- 573 24. Doren, M. V., Williamson, A. L. & Lehmann, R. Regulation of zygotic gene expression in  
574 *Drosophila* primordial germ cells. *Current Biology* **8**, 243–246 (1998).
- 575 25. Halbach, F., Reichelt, P., Rode, M. & Conti, E. The Yeast Ski Complex: Crystal Structure  
576 and RNA Channeling to the Exosome Complex. *Cell* **154**, 814–826 (2013).
- 577 26. Théry, C., Zitvogel, L. & Amigorena, S. Exosomes: composition, biogenesis and function.  
578 *Nat Rev Immunol* **2**, 569–579 (2002).
- 579 27. Becker, T. *et al.* Structure of the no-go mRNA decay complex Dom34-Hbs1 bound to a  
580 stalled 80S ribosome. *Nat Struct Mol Biol* **18**, 715–720 (2011).
- 581 28. Yang, F. *et al.* The RNA surveillance complex Pelota-Hbs1 is required for transposon  
582 silencing in the *Drosophila* germline. *EMBO reports* **16**, 965–974 (2015).
- 583 29. Li, Z., Yang, F., Xuan, Y., Xi, R. & Zhao, R. Pelota-interacting G protein Hbs1 is required  
584 for spermatogenesis in *Drosophila*. *Sci Rep* 1–14 (2019). doi:10.1038/s41598-019-  
585 39530-6
- 586 30. Théry, C., Zitvogel, L. & Amigorena, S. Exosomes: composition, biogenesis and function.  
587 *arXiv* **2**, 569–579 (2002).
- 588 31. Halbach, F. Structural and Functional Characterization of the Yeast Ski2–Ski3–Ski8  
589 Complex. 1–126 (2013).
- 590 32. Flora, P. *et al.* Sequential Regulation of Maternal mRNAs through a Conserved cis-Acting  
591 Element in Their 3' UTRs. *Cell Reports* **25**, 3828–3843.e9 (2018).
- 592 33. Ohlstein, B. & McKearin, D. Ectopic expression of the *Drosophila* Bam protein eliminates  
593 oogenic germline stem cells. *Development* **124**, 3651 (1997).
- 594 34. Jia Ng, S. S., Zheng, R. T., Osman, I. & Pek, J. W. Generation of *Drosophila* *sis*RNAs by  
595 Independent Transcription from Cognate Introns. *ISCIENCE* **4**, 68–75 (2018).
- 596 35. Wineland, D. M., Kelsch, D. J. & Tootle, T. L. Multiple Pools of Nuclear Actin. *Anat. Rec.*  
597 **301**, 2014–2036 (2018).
- 598 36. Duan, T., Green, N., Tootle, T. L. & Geyer, P. K. Nuclear architecture as an intrinsic  
599 regulator of *Drosophila* female germline stem cell maintenance. *Development and*  
600 *regulation* **37**, 30–38 (2020).
- 601 37. Kelsch, D. J., Groen, C. M., Fagan, T. N., Sudhir, S. & Tootle, T. L. Fascin regulates  
602 nuclear actin during *Drosophila* oogenesis. *Molecular Biology of the Cell* **27**, 2965–2979  
603 (2016).
- 604 38. Fingerhut, J. M., Moran, J. V. & Yamashita, Y. M. Satellite DNA-containing gigantic  
605 introns in a unique gene expression program during *Drosophila* spermatogenesis. *PLoS*



- 606 *Genet* **15**, e1008028 (2019).
- 607 39. Estes, J. E., Selden, L. A. & Gershman, L. C. Mechanism of action of phalloidin on the  
608 polymerization of muscle actin. *Biochemistry* **20**, 708–712 (1981).
- 609 40. Schneider, C. & Tollervey, D. Threading the barrel of the RNA exosome. 1–9 (2013).  
610 doi:10.1016/j.tibs.2013.06.013
- 611 41. Avery, P. *et al.* Drosophila Upf1 and Upf2 loss of function inhibits cell growth and causes  
612 animal death in a Upf3-independent manner. *RNA* **17**, 624–638 (2011).
- 613 42. Mitchell, P. & Tollervey, D. An NMD pathway in yeast involving accelerated deadenylation  
614 and exosome-mediated 3'→5' degradation. *Molecular Cell* **11**, 1405–1413 (2003).
- 615 43. Lykke-Andersen, S. & Jensen, T. H. Nonsense-mediated mRNA decay: an intricate  
616 machinery that shapes transcriptomes. *Nature Publishing Group* **16**, 665–677 (2015).
- 617 44. Peltz, S. W., Brown, A. H. & Jacobson, A. mRNA destabilization triggered by premature  
618 translational termination depends on at least three cis-acting sequence elements and one  
619 trans-acting factor. *Genes & Development* **7**, 1737–1754 (1993).
- 620 45. Dunn, J. G., Foo, C. K., Belletier, N. G., Gavis, E. R. & Weissman, J. S. Ribosome  
621 profiling reveals pervasive and regulated stop codon readthrough in Drosophila  
622 melanogaster. *eLife* **2013**, 1–32 (2013).
- 623 46. Hashimoto, Y., Takahashi, M., Sakota, E. & Nakamura, Y. Nonstop-mRNA decay  
624 machinery is involved in the clearance of mRNA 5'-fragments produced by RNAi and  
625 NMD in Drosophila melanogaster cells. *Biochemical and Biophysical Research  
626 Communications* **484**, 1–7 (2017).
- 627 47. Schweingruber, C., Rufener, S. C., Zünd, D., Yamashita, A. & Mühlemann, O. Nonsense-  
628 mediated mRNA decay — Mechanisms of substrate mRNA recognition and degradation  
629 in mammalian cells. *BBA - Gene Regulatory Mechanisms* **1829**, 612–623 (2013).
- 630 48. Kobayashi, K. *et al.* Structural basis for mRNA surveillance by archaeal Pelota and GTP-  
631 bound EF1alpha complex. *Proc. Natl. Acad. Sci. U.S.A.* **107**, 17575–17579 (2010).
- 632 49. Jamar, N. H., Kritsiligkou, P. & Grant, C. M. The non-stop decay mRNA surveillance  
633 pathway is required for oxidative stress tolerance. *Nucleic Acids Research* **45**, 6881–  
634 6893 (2017).
- 635 50. Xi, R., Doan, C., Liu, D. & Xie, T. Pelota controls self-renewal of germline stem cells by  
636 repressing a Bam-independent differentiation pathway. *Development* **132**, 5365–5374  
637 (2005).
- 638 51. Edri, S. & Tuller, T. Quantifying the Effect of Ribosomal Density on mRNA Stability. *PLoS  
639 ONE* **9**, e102308 (2014).
- 640 52. Guydosh, N. R. & Green, R. Dom34 Rescues Ribosomes in 3' Untranslated Regions. *Cell*  
641 **156**, 950–962 (2014).
- 642 53. Guydosh, N. R. & Green, R. Translation of poly(A) tails leads to precise mRNA cleavage.  
643 *RNA* **23**, 749–761 (2017).
- 644 54. Zinoviev, A., Ayupov, R. K., Abaeva, I. S., Hellen, C. U. T. & Pestova, T. V. Extraction of  
645 mRNA from Stalled Ribosomes by the Ski Complex. *Molecular Cell* **77**, 1340–1349.e6  
646 (2020).
- 647 55. Simms, C. L., Yan, L. L. & Zaher, H. S. Ribosome Collision Is Critical for Quality Control  
648 during No-Go Decay. *Molecular Cell* **68**, 361–373.e5 (2017).
- 649 56. Hanson, G. & Collier, J. Codon optimality, bias and usage in translation and mRNA decay.  
650 *Nat Rev Mol Cell Biol* (2017). doi:10.1038/nrm.2017.91
- 651 57. Sharp, P. M. & Li, W. H. The codon Adaptation Index--a measure of directional  
652 synonymous codon usage bias, and its potential applications. *Nucleic Acids Research* **15**,  
653 1281–1295 (1987).
- 654 58. Presnyak, V. *et al.* Codon optimality is a major determinant of mRNA stability. *Cell* **160**,  
655 1111–1124 (2015).
- 656 59. Serano, T. L., Cheung, H.-K., Frank, L. H. & Cohen, R. S. P element transformation

- 657 vectors for studying *Drosophila melanogaster* oogenesis and early embryogenesis. *Gene*  
658 **138**, 181–186 (1994).
- 659 60. Gavis, E. R. & Lehmann, R. Localization of nanos RNA controls embryonic polarity. *Cell*  
660 **71**, 301–313 (1992).
- 661 61. Gavis, E. R. & Lehmann, R. Translational regulation of nanos by RNA localization. *Nature*  
662 **369**, 315–318 (1994).
- 663 62. McDermott, S. M. & Davis, I. *Drosophila* Hephaestus/polypyrimidine tract binding protein  
664 is required for dorso-ventral patterning and regulation of signalling between the germline  
665 and soma. *PLoS ONE* **8**, e69978–e69978 (2013).
- 666 63. Van Buskirk, C. & Trudi, S. Half pint Regulates Alternative Splice Site Selection in  
667 *Drosophila*. 1–11 (2002).
- 668 64. Chen, D. & McKearin, D. Dpp signaling silences bam transcription directly to establish  
669 asymmetric divisions of germline stem cells. *Current Biology* **13**, 1786–1791 (2003).
- 670 65. Chen, D. & McKearin, D. M. A discrete transcriptional silencer in the bam gene  
671 determines asymmetric division of the *Drosophila* germline stem cell. *Development*  
672 (*Cambridge, England*) **130**, 1159–1170 (2003).
- 673 66. Lilly, M. A. & Spradling, A. C. The *Drosophila* endocycle is controlled by cyclin E and  
674 lacks a checkpoint ensuring S-phase completion. *Genes & Development* **10**, 2514–2526  
675 (1996).
- 676 67. Calvi, B. R., Lilly, M. A. & Spradling, A. C. Cell cycle control of chorion gene amplification.  
677 *Genes & Development* **12**, 734–744 (1998).
- 678 68. Mach, J. M. & Lehmann, R. An Egalitarian-BicaudalD complex is essential for oocyte  
679 specification and axis determination in *Drosophila*. *Genes & Development* **11**, 423–435  
680 (1997).
- 681 69. Schultz, R. M. The molecular foundations of the maternal to zygotic transition in the  
682 preimplantation embryo. *Hum Reprod Update* **8**, 323–331 (2002).
- 683 70. Tadros, W. *et al.* Regulation of maternal transcript destabilization during egg activation in  
684 *Drosophila*. *Genetics* **164**, 989–1001 (2003).
- 685 71. Cabrera Quio, L. E., Schleiffer, A., Mechtler, K. & Pauli, A. Zebrafish Ski7 tunes RNA  
686 levels during the oocyte-to-embryo transition. *bioRxiv* 2020.03.19.998716 (2020).
- 687 72. Xie, T. & Spradling, A. C. A Niche Maintaining Germ Line Stem Cells in the *Drosophila*  
688 Ovary. *Science Reports* **290**, 328–330 (2000).
- 689 73. Gerbasi, V. R. *et al.* Blanks, a nuclear siRNA/dsRNA-binding complex component, is  
690 required for *Drosophila* spermiogenesis. *Proceedings of the National Academy of*  
691 *Sciences* **108**, 3204–3209 (2011).
- 692 74. Upadhyay, M. *et al.* Transposon Dysregulation Modulates dWnt4 Signaling to Control  
693 Germline Stem Cell Differentiation in *Drosophila*. *PLoS Genet* **12**, (2016).
- 694 75. McCarthy, A., Deiulio, A., Martin, E. T., Upadhyay, M. & Rangan, P. Tip60 complex  
695 promotes expression of a differentiation factor to regulate germline differentiation in  
696 female *Drosophila*. *Molecular Biology of the Cell* **29**, 2933–2945 (2018).
- 697 76. Kim, D., Langmead, B. & Salzberg, S. L. HISAT: a fast spliced aligner with low memory  
698 requirements. *Nat Meth* **12**, 357–360 (2015).
- 699 77. Liao, Y., Smyth, G. K. & Shi, W. featureCounts: an efficient general purpose program for  
700 assigning sequence reads to genomic features. *Bioinformatics* **30**, 923–930 (2014).
- 701 78. Flora, P. *et al.* Transient transcriptional silencing alters the cell cycle to promote germline  
702 stem cell differentiation in *Drosophila*. *Developmental Biology* **434**, 84–95 (2018).
- 703 79. Wang, X. & Page-McCaw, A. Wnt6 maintains anterior escort cells as an integral  
704 component of the germline stem cell niche. *Development (Cambridge, England)* **145**,  
705 (2018).
- 706 80. Weidmann, C. A. *et al.* *Drosophila* Nanos acts as a molecular clamp that modulates the  
707 RNA-binding and repression activities of Pumilio. *eLife* **5**, e17096 (2016).

- 708 81. Fuchs, G., Diges, C., Kohlstaedt, L. A., Wehner, K. A. & Sarnow, P. Proteomic analysis of  
709 ribosomes: translational control of mRNA populations by glycogen synthase GYS1.  
710 *Journal of Molecular Biology* **410**, 118–130 (2011).  
711 82. Bailey, T. L. & Elkan, C. Fitting a mixture model by expectation maximization to discover  
712 motifs in biopolymers. *Proceedings of the Second International Conference on Intelligent*  
713 *Systems for Molecular Biology* **2**, 28–36 (1994).  
714  
715  
716  
717  
718  
719  
720  
721  
722  
723  
724  
725  
726  
727  
728  
729  
730  
731  
732  
733  
734  
735  
736  
737

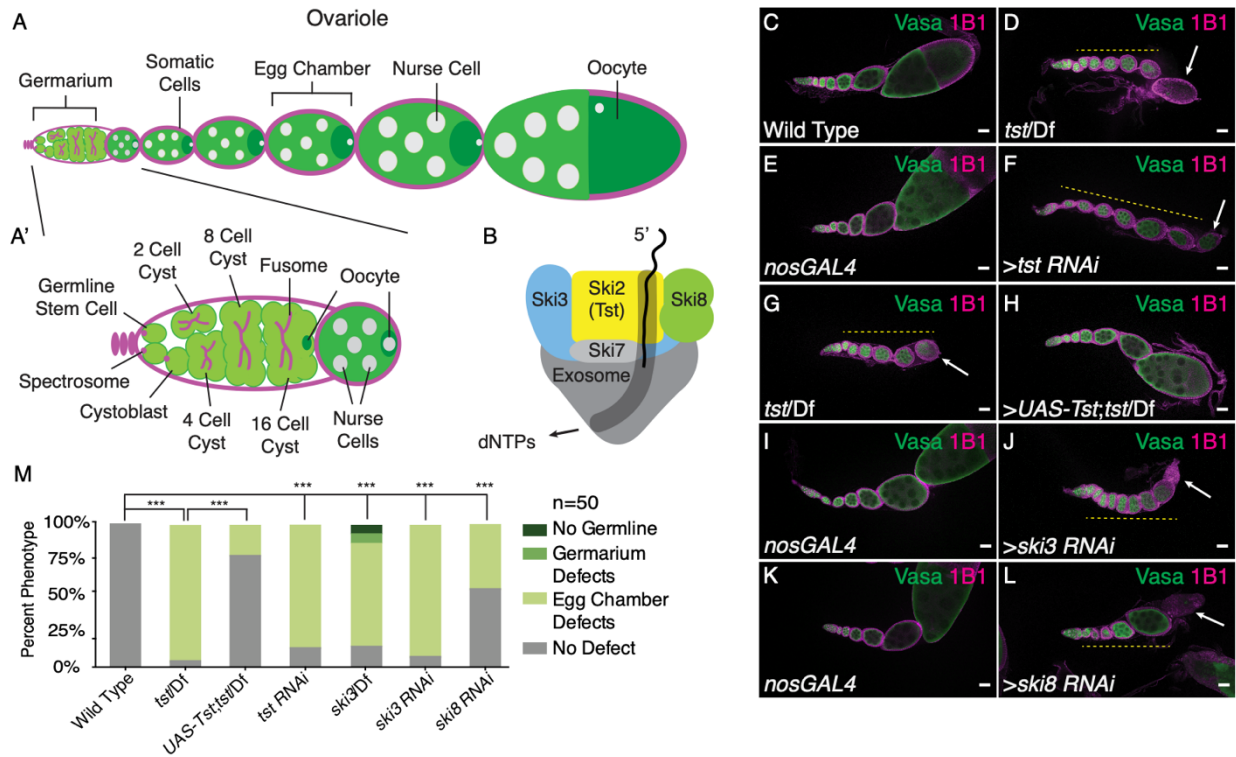

738  
 739 **Figure 1. Components of the Ski Complex are required in the germ line for oogenesis. (A)**  
 740 **Schematic of a *Drosophila* ovariole and (A') germarium. (B) Representation of the Ski Complex**  
 741 **composed of Ski2 (Tst, yellow), Ski3 (blue), two Ski8 proteins (green), and Ski7 (light gray)**  
 742 **threading mRNA (black) into the exosome (dark gray) where mRNA degradation occurs. (C)**  
 743 **Confocal image of an adult WT control ovariole stained with Vasa (green) and 1B1 (magenta)**  
 744 **showing normal egg chamber development. (D) Confocal image of a *tst* genomic mutant ovariole**  
 745 **stained with 1B1, Vasa and indicating egg chambers that do not grow in size (yellow dashed line)**  
 746 **and dying egg chamber (arrow). (E) Confocal image of a *nosGAL4* driver control ovariole**  
 747 **stained with 1B1 and Vasa. (F) *tst* germline RNAi knockdown ovariole stained with 1B1, Vasa,**  
 748 **and indicating egg chambers that do not grow in size (yellow dashed line) and dying egg chamber**  
 749 **(arrow). (G) Confocal image of a *tst* genomic mutant ovariole stained with 1B1 and Vasa. (H)**  
 750 **Confocal image of a *tst* genomic mutant ovariole expressing recombinant Tst protein in the**  
 751 **germline stained with 1B1 and Vasa. (I) Confocal image of a *nosGAL4* driver control ovariole**  
 752 **stained with 1B1 and Vasa. (J) *ski3* germline RNAi knockdown ovariole of stained with 1B1, Vasa,**  
 753 **and indicating egg chambers that do not grow in size (yellow dashed line) and dying egg chamber**  
 754 **(arrow). (K) Confocal image of a *nosGAL4* driver control ovariole stained with 1B1 and Vasa. (L)**  
 755 ***ski8* germline RNAi knockdown ovariole stained with 1B1, Vasa, and indicating egg chambers**  
 756 **that do not grow in size (yellow dashed line) and dying egg chamber (arrow). (M) Quantification**  
 757 **of oogenesis defect phenotypes observed in Ski complex genomic mutants, germline RNAi**  
 758 **knockdowns and UAS-Tst rescue (Control vs *tst/Df* n=50, p<0.001, *tst/Df* vs *UAS-Tst;tst/Df* n=50,**  
 759 **p<0.001, Control vs *tst RNAi* n=50, p<0.001, Control vs *ski3/Df* n=50, p<0.001, Control vs *ski3***  
 760 ***RNAi* n=50, p<0.001, Control vs *ski8 RNAi* n=50, p<0.001, Chi Square Analyses). Scale bars are**  
 761 **10µm.**  
 762  
 763



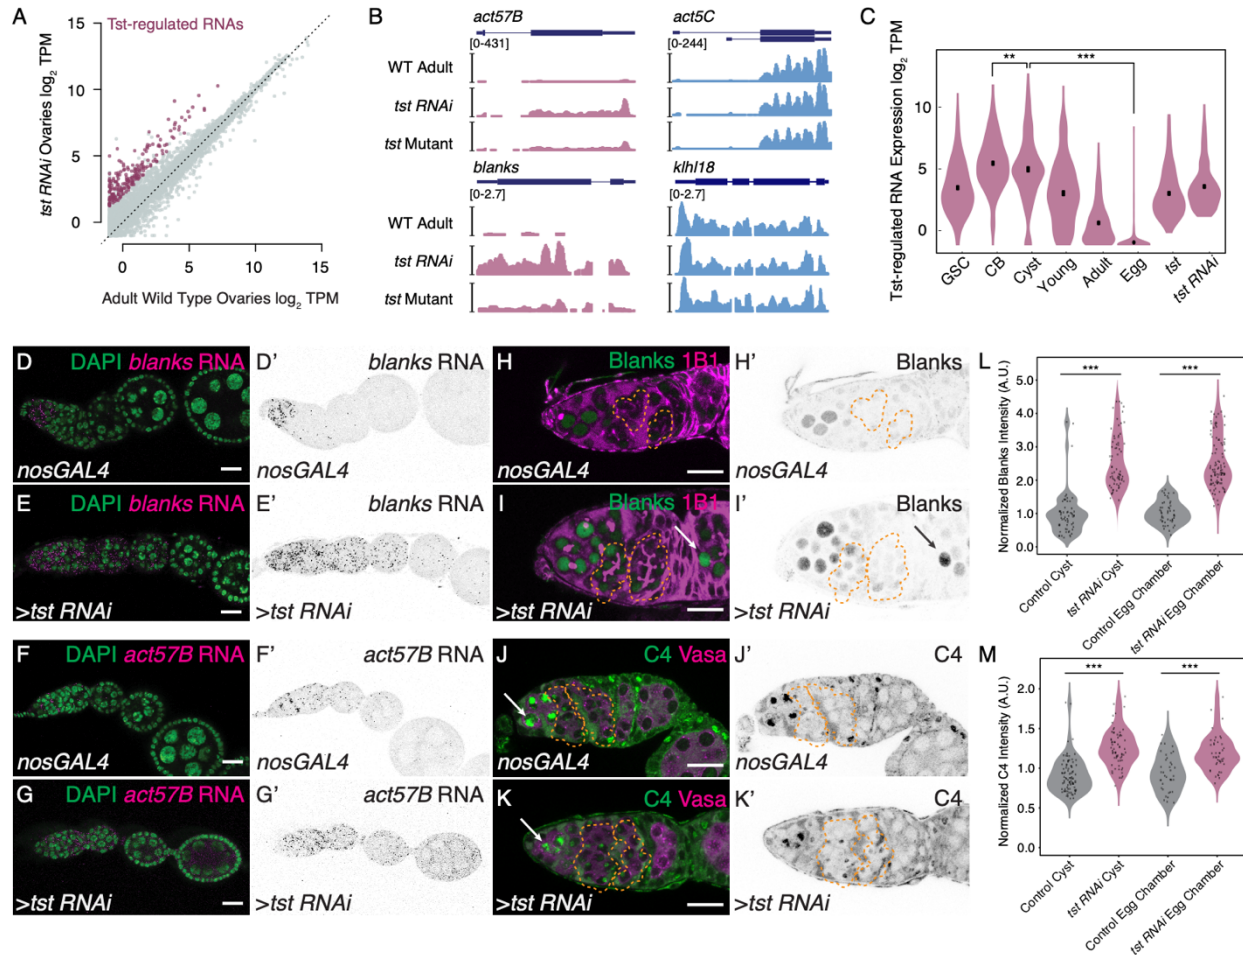

764  
765  
766  
767  
768  
769  
770  
771  
772  
773  
774  
775  
776  
777  
778  
779  
780  
781  
782  
783  
784  
785  
786

**Figure 2. Tst promotes degradation of a subset of transcripts prior to oocyte specification.**

(A) Biplot of RNA-Seq data from adult WT and *tst* germline RNAi knockdown ovaries in log<sub>2</sub> Transcripts Per Million (TPM) highlighting upregulated Tst-regulated RNAs (magenta). (B) Genome browser tracks of Tst-regulated genes *act57B* and *blanks* (magenta) and non-target genes *act5C* and *klh18* (blue). (C) Violin plot of Tst-regulated RNAs from germline stem cells (GSC), cystoblasts (CB), differentiating cysts (Cyst), young WT ovaries (Young), adult WT ovaries (Adult), unfertilized eggs (Egg), *tst* mutant (*tst*) and *tst* germline RNAi (*tst RNAi*) ovaries showing the decrease in expression of Tst-regulated RNAs after differentiation and cyst stages (n=207, CB vs cyst p<0.002, cyst vs egg p<0.0001, Paired t-Test). (D-D') Confocal images of *in situ* hybridizations probing against *blanks* RNA (magenta, grayscale) and DAPI (green) in *nosGAL4* showing *blanks* RNA expression restricted to the undifferentiated cells and in (E-E') *tst RNAi* ovarioles where *blanks* RNA expression is expanded to egg chambers. (F-F') Confocal images of *in situ* hybridizations probing against *act57B* mRNA (magenta, grayscale) and DAPI (green) in *nosGAL4* showing low *act57B* RNA expression and (G-G') *tst RNAi* ovarioles exhibiting expanded *act57B* RNA expression in the germarium and egg chambers. (H-H') Confocal images of *nosGAL4* and (I-I') *tst RNAi* germaria stained for 1B1 (magenta) and Blanks protein (green and grayscale) showing expanded Blanks expression in *tst RNAi* cysts (orange dashed lines) and egg chambers (arrow). (J-J') Confocal images of *nosGAL4* and (K-K') *tst RNAi* germaria stained for Vasa (magenta) and C4 antibody (nuclear Actin) (green and grayscale) showing expanded nuclear Actin expression in *tst RNAi* cysts (orange dashed line). (L) Arbitrary Units (A.U.)

787 quantification of Blanks protein expression normalized to control cysts in Control (gray) and *tst*  
 788 *RNAi* (magenta) cysts and egg chambers (WT cyst n=60, *tst RNAi* cyst n=70,  $p < 0.0001$ . WT egg  
 789 chamber n=49, *tst RNAi* egg chamber n=102,  $p < 0.0001$ , Student's t-Test). (M) A.U. quantification  
 790 of nuclear Actin expression normalized to control cysts in Control (gray) and *tst RNAi* (magenta)  
 791 cysts and egg chambers (WT cyst n=92, *tst RNAi* cyst n=73,  $p < 0.0001$ . WT egg chamber n=38,  
 792 *tst RNAi* egg chamber n=45,  $p < 0.0001$ , Student's t-Test). Scale bars are 10 $\mu$ m.  
 793  
 794  
 795

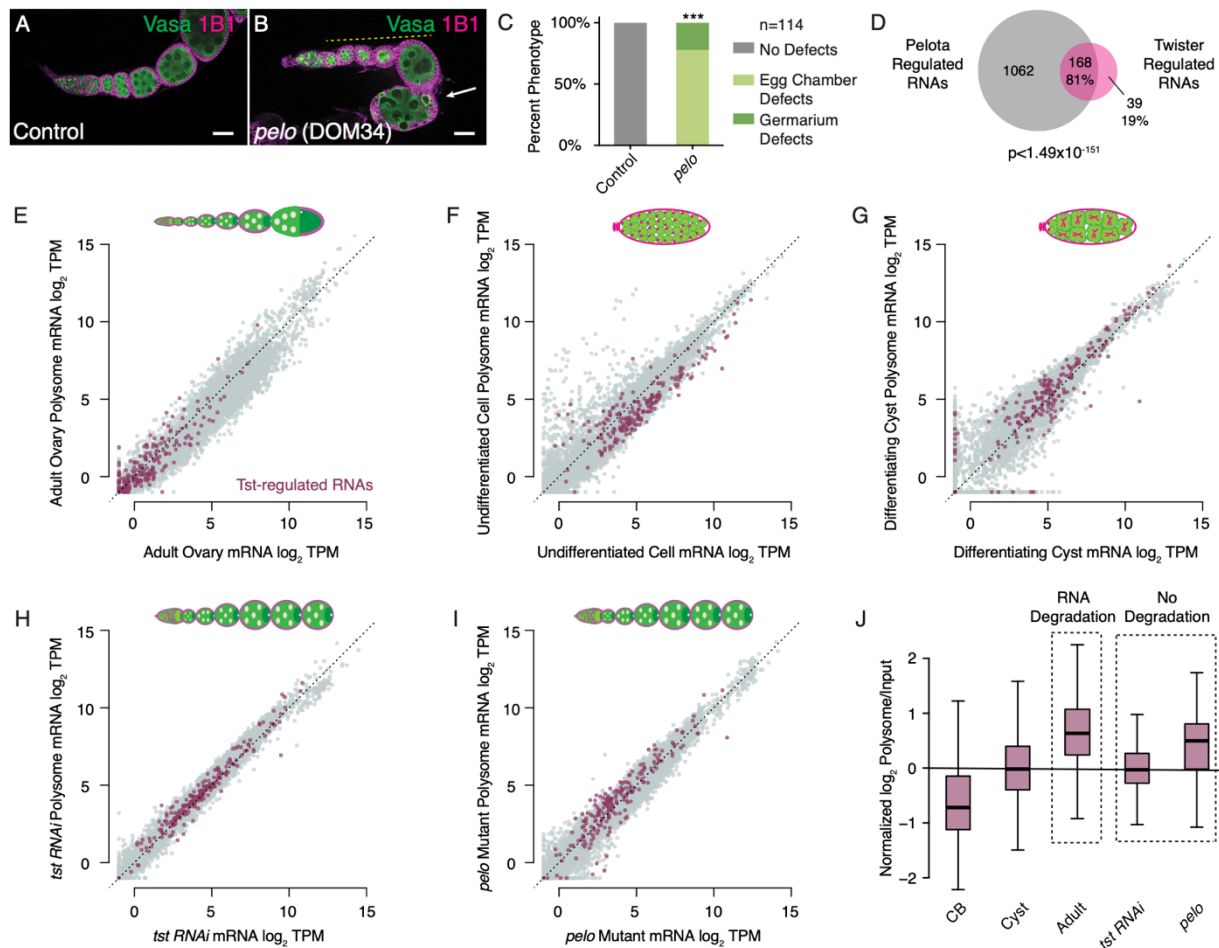

796  
 797  
 798  
 799 **Figure 3. Tst-regulated RNAs are coregulated by Pelota and exhibit an increased ribosome**  
 800 **association concurrent with a decrease in mRNA abundance.** (A) Confocal image of a WT  
 801 control and (B) *pelo*<sup>1</sup> mutant ovariole stained with 1B1 (magenta) and Vasa (green) and indicating  
 802 egg chambers that fail to grow (yellow dashed line) and subsequently die (arrow). (C)  
 803 Quantification of oogenesis defect phenotypes observed in *pelo*<sup>1</sup> mutants (n=113,  $p < 0.001$ , Chi  
 804 Square Analysis). (D) Venn diagram illustrating overlap of 81% of Tst-regulated RNAs that are >2  
 805 fold upregulated upon loss of *pelo* ( $p < 1.49 \times 10^{-151}$ , Hypergeometric Test). (E) Biplot of poly(A)  
 806 mRNA Input log<sub>2</sub> TPM versus polysome associated mRNA log<sub>2</sub> TPM from adult WT ovaries  
 807 highlighting Tst-regulated RNAs (magenta) showing low RNA abundance. (F) Biplot of poly(A)  
 808 mRNA Input log<sub>2</sub> TPM versus polysome associated mRNA log<sub>2</sub> TPM from undifferentiated germ  
 809 cells highlighting Tst-regulated RNAs (magenta) indicating both an increased RNA abundance

810 and ribosome association compared to Adult WT. **(G)** Biplot of poly(A) mRNA input  $\log_2$  TPM  
811 versus polysome associated mRNA  $\log_2$  TPM from differentiating cysts highlighting Tst-regulated  
812 RNAs (magenta) indicating both an increased RNA abundance and ribosome association  
813 compared to Adult WT. **(H)** Biplot of poly(A) mRNA input  $\log_2$  TPM versus polysome associated  
814 mRNA  $\log_2$  TPM in germline *tst RNAi* ovaries highlighting Tst-regulated RNAs (magenta)  
815 indicating both an increased RNA abundance and ribosome association compared to Adult WT.  
816 **(I)** Biplot of poly(A) mRNA input  $\log_2$  TPM versus polysome associated mRNA  $\log_2$  TPM in *pelo*<sup>1</sup>  
817 ovaries highlighting Tst-regulated RNAs (magenta) indicating both an increased RNA abundance  
818 and ribosome association compared to adult WT. Scale bars are 10 $\mu$ m. **(J)** Quantification of  
819 normalized  $\log_2$  polysome/input mRNA of Tst-regulated RNAs in CB, cyst, adult, *tst RNAi* and *pelo*  
820 samples showing increased ribosome association during the transition from CB to cyst to adult.  
821 Ribosome association is comparable for cyst and *tst RNAi* and adult and *pelo* in which RNA  
822 degradation is not occurring.



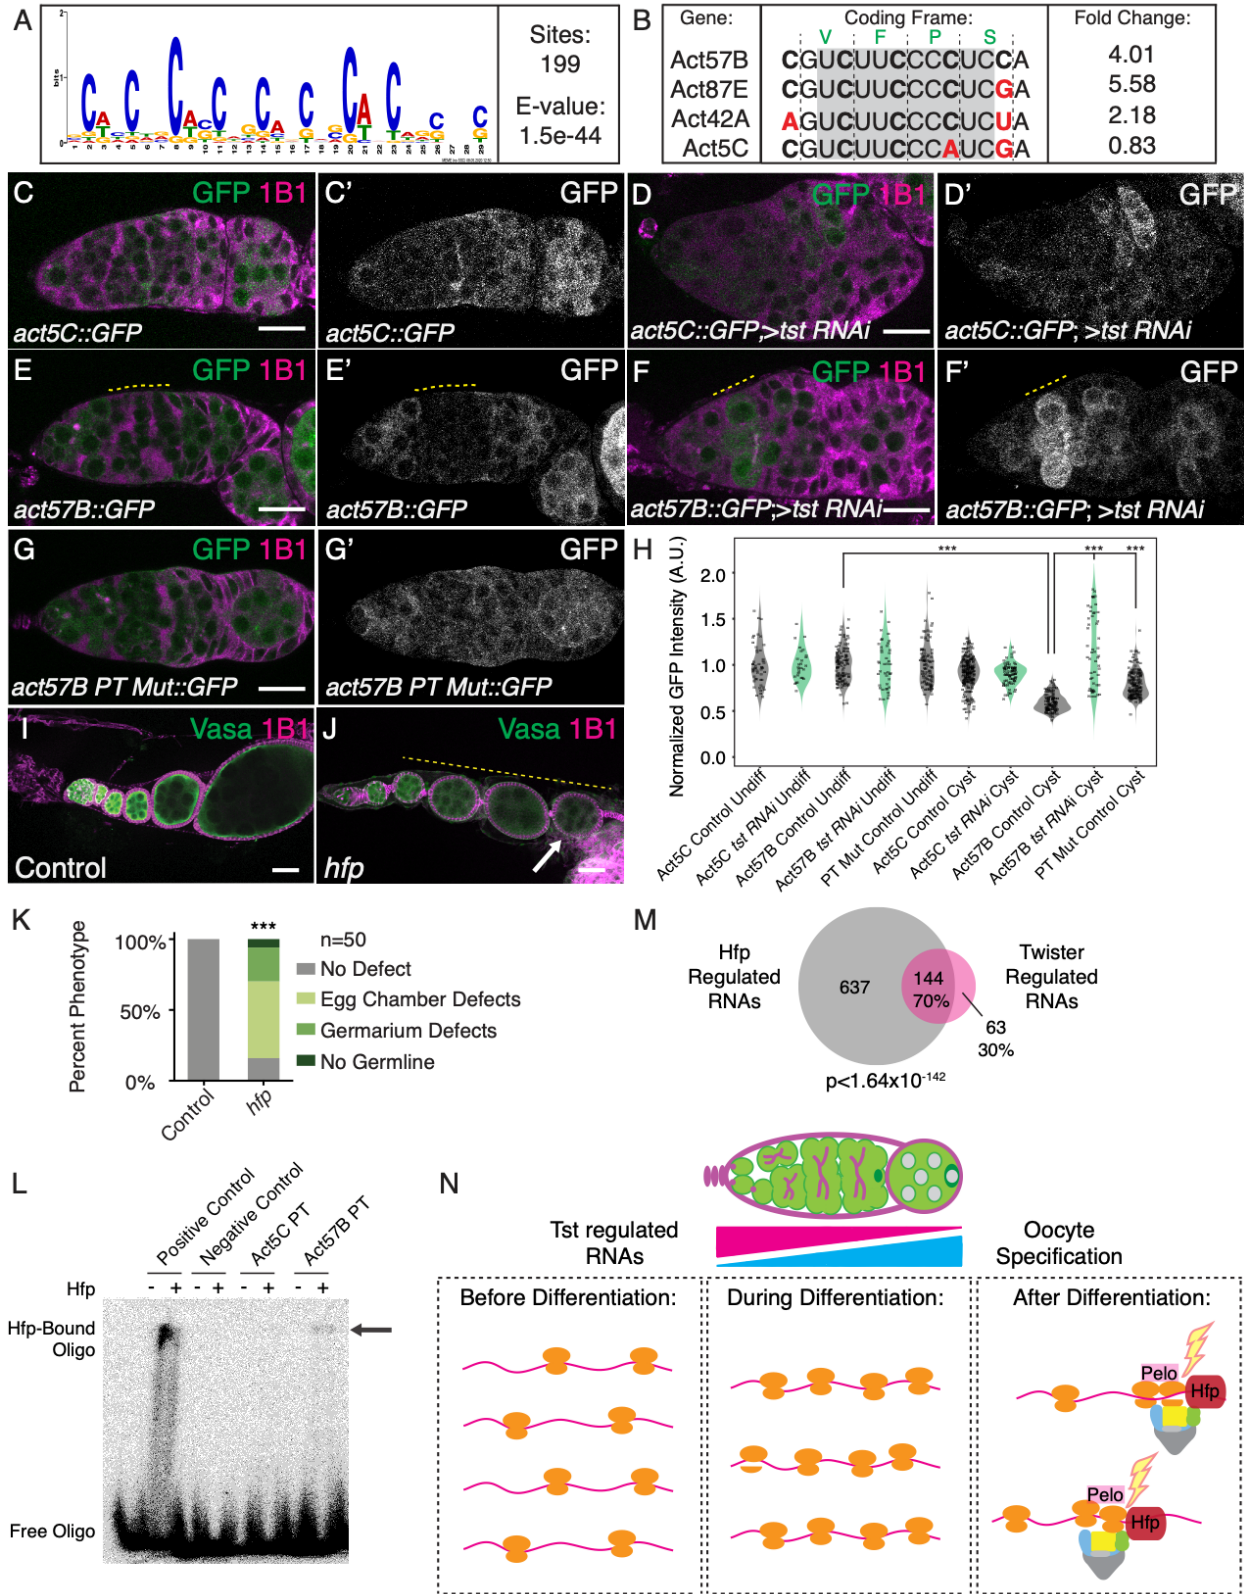

823  
824  
825



826 **Figure 4. Tst-regulated RNAs are regulated by polypyrimidine rich sequence in their CDS**  
827 **that can be bound by Half Pint. (A)** MEME logo of the polypyrimidine-rich motif enriched in the  
828 CDS of Tst-regulated RNAs. **(B)** CDS alignment of polypyrimidine-rich tracts (PTs) found in the  
829 Tst-regulated RNAs *act57B*, *act87E*, *act42A*, the non-target paralog *act5C* and their respective  
830 fold changes upon loss of *tst*. Black vertical lines indicate coding frame with amino acid symbols  
831 above. Probe for EMSA experiments boxed in gray and purine transitions in *act5C* highlighted in  
832 red. **(C-C')** Germarium showing the expression of germline *actin5C::GFP* fusion reporter (green,  
833 grayscale) in control and **(D-D')** *tst RNAi* stained with 1B1 (magenta) that does not change in the  
834 cysts. **(E-E')** Germarium showing the expression of germ line *actin57B::GFP* fusion reporter  
835 (green, grayscale) and stained with 1B1 (magenta) showing a decrease in *actin57B::GFP*  
836 expression level in cysts (yellow dashed line) and in **(F-F')** *tst RNAi* showing higher *actin57B::GFP*  
837 expression level in cysts (yellow dashed line) compared to control. **(G-G')** Germarium showing  
838 the expression of germ line *actin57B PT Mutant::GFP* fusion reporter (green, grayscale) in WT  
839 stained with 1B1 (magenta) showing consistent *actin57B PT Mutant::GFP* in both undifferentiated  
840 and cyst stages. **(H)** A.U. quantification of reporter GFP intensity in undifferentiated cells and cyst  
841 stages in WT indicating significantly lower *actin57B::GFP* expression in WT cysts compared to  
842 undifferentiated cells. Expression of *actin57B::GFP* is significantly higher in *tst RNAi* cysts  
843 compared to WT control cysts. Expression of *actin57B PT Mutant::GFP* is significantly higher than  
844 *actin57B::GFP* in WT control cysts. (*actin57B::GFP* Control undifferentiated cells n=110,  
845 *actin57B::GFP* Control Cyst n=116, p<0.0001, *actin57B::GFP tst RNAi* Cyst n=53, p<0.0001,  
846 *actin57B PT Mutant::GFP* Cyst n=158, p<0.0001 Student's t-Test). **(I)** Confocal image of Control  
847 and **(J)** *hfp* mutant ovariole stained with 1B1 (magenta) and Vasa (green) showing egg chambers  
848 that do not grow in size (yellow dashed line) and dying egg chamber (arrow). **(K)** Quantification  
849 of *hfp* oogenesis defect phenotypes compared to control (n=50, p<0.001, Chi Square Analysis).  
850 **(L)** EMSA of recombinant Hfp N-terminal RRM shows that Hfp RRM binds the *Drosophila*  
851 consensus polypyrimidine-rich sequence (Positive Control) and *act57B* PT sequence (from **B**) but  
852 not the random scramble sequence (Negative Control), or the *act5C* PT sequence. **(M)** Venn  
853 diagram illustrating overlap of 70% of Tst-regulated RNAs upregulated upon loss of *hfp*  
854 (p<1.64x10<sup>-142</sup>, Hypergeometric Test). Scale bars are 10µm. **(N)** In undifferentiated cells Tst-  
855 regulated RNAs are highly expressed, yet lowly associated with ribosomes, and required for early  
856 oogenesis. During differentiation, translation of Tst-regulated RNAs increases. After  
857 differentiation, during oocyte specification, Hfp protein binds in the CDS of Tst-regulated RNAs  
858 leading to targeting by Pelo, and the Ski complex.

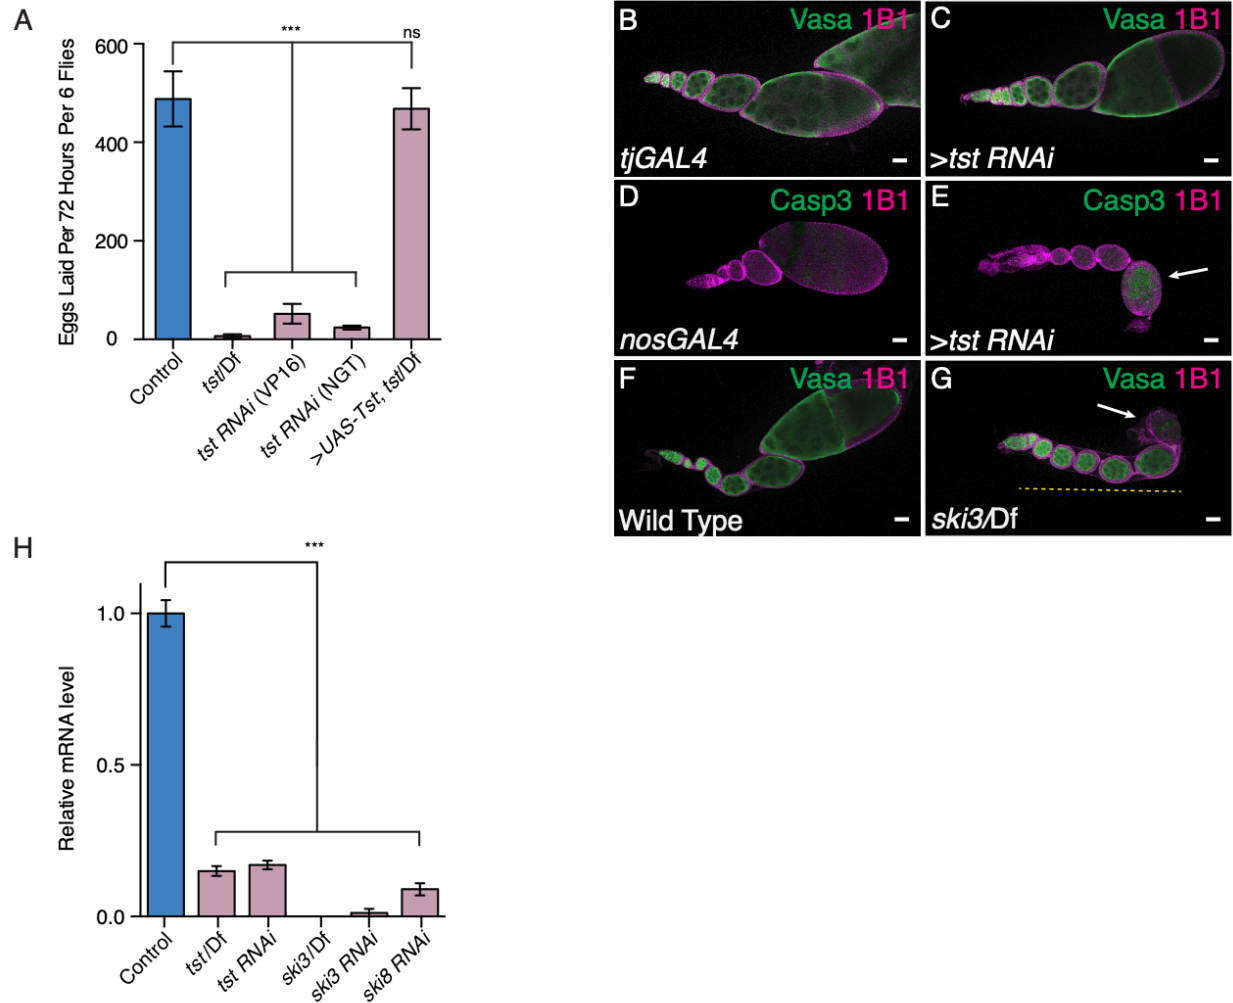

859  
 860 **Figure S1. Ski Complex components are required for successful oogenesis.** (A) Egg laying  
 861 test assaying the fertility of several Ski complex mutants and germline RNAi knockdown females  
 862 indicating a loss of fertility compared to control (Control vs *tst/Df* n=3, p<0.001, Control vs *tst RNAi*  
 863 (*VP16*), n=3, p<0.001, Control vs *tst RNAi (NGT)*, n=3, p<0.001, Control vs *UAS-Tst;tst/Df*, n=3,  
 864 not significant (ns) p>0.05, Error bars are standard deviation (SD), Student's t-Test). (B) *tjGAL4*  
 865 driver control and (C) *tst RNAi* ovarioles stained with Vasa (green) and 1B1 (magenta) exhibiting  
 866 ovarioles that grow in size and generate later stages. (D) *nosGAL4* driver control and (E) *tst RNAi*  
 867 ovarioles stained with cleaved Caspase 3 (green) and 1B1 (magenta) indicating dying egg  
 868 chamber (arrow). (F) WT control and (G) *ski3* mutant ovarioles stained with Vasa (green) and 1B1  
 869 (magenta) indicating egg chambers that do not grow in size (yellow dashed line) and dying egg  
 870 chambers (arrow). (H) qRT-PCR assaying the levels of *tst*, *ski3* and *ski8* in their respective mutant  
 871 background or germline RNAi normalized to control levels and indicating successful knockdown  
 872 (*tst* Control vs *tst/Df* n=3, p<0.001, *tst* Control vs *tst RNAi* n=3, p<0.001, *ski3* Control vs *ski3/Df*  
 873 n=3, p<0.001, *ski3* Control vs *ski3 RNAi* n=3, p<0.001, *ski8* Control vs *ski8 RNAi* n=3, p<0.001,  
 874 Error bars are SEM, Student's t-Test). Scale bars are 10µm.

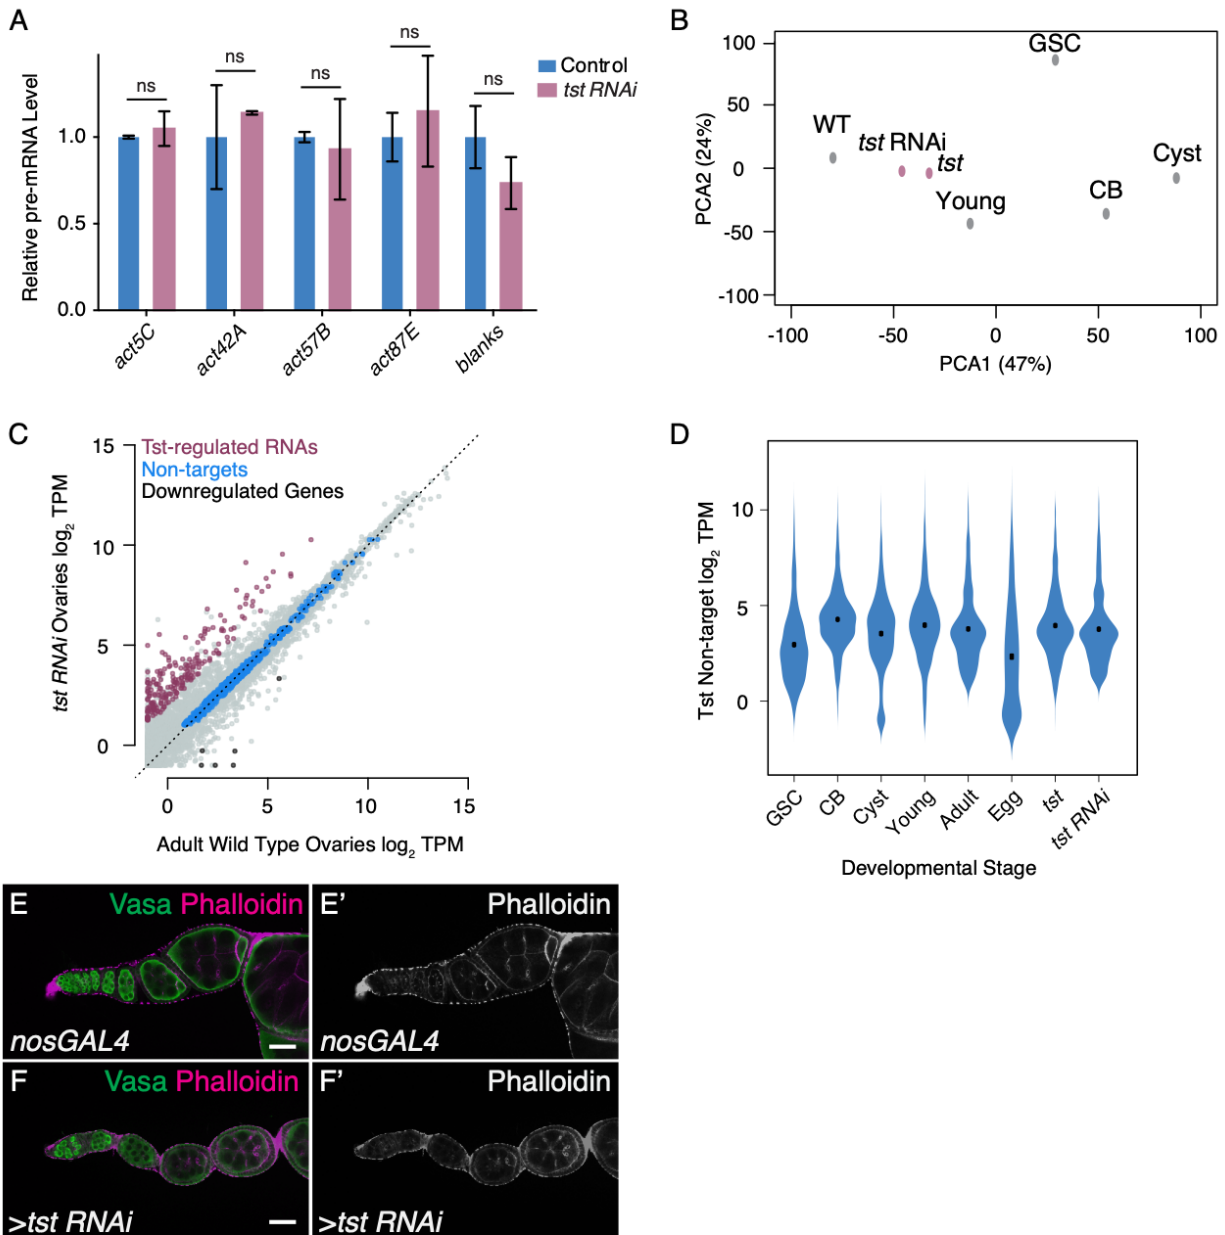

875  
 876 **Figure S2. Tst post-transcriptionally regulates its target RNAs.** (A) qRT-PCR assaying the  
 877 pre-mRNA levels of several Tst-regulated target genes, including *blanks*, *act42A*, *act57B*, *act87E*  
 878 and the non-target *act5C* in Control and germline *tst RNAi* normalized to control levels and  
 879 indicating similar pre-mRNA levels in both conditions (*act5C* pre-mRNA Control level vs *tst RNAi*  
 880  $n=2$ , ns,  $p>0.05$ , *act42A* pre-mRNA Control level vs *tst RNAi*  $n=2$ , ns,  $p>0.05$ , *act57B* pre-mRNA  
 881 Control level vs *tst RNAi*  $n=3$ , ns,  $p>0.05$ , *act87E* pre-mRNA Control level vs *tst RNAi*  $n=2$ , ns,  
 882  $p>0.05$ , *blanks* pre-mRNA Control level vs *tst RNAi*  $n=3$ , ns,  $p>0.05$ , Error bars are SEM,  
 883 Student's t-Test). (B) Principal Component Analysis (PCA) comparing several ovary RNA-seq  
 884 data sets including, adult (WT), *tst RNAi*, *tst* genomic mutant (*tst*), young WT (Young), germline  
 885 stem cell enriched (GSC), undifferentiated cystoblast enriched (CB), and differentiating cyst  
 886 enriched (Cyst). This indicates that the *tst* mutant and *tst RNAi* samples are similar to Adult WT.

887 (C) Biplot of RNA-Seq data from Adult WT and *tst* germ line RNAi knockdown ovaries in log<sub>2</sub>  
 888 Transcripts Per Million (TPM) highlighting upregulated Tst-regulated RNAs (magenta), non-target  
 889 RNAs (blue), and RNAs concordantly downregulated in both *tst* RNAi and *tst* genomic mutant  
 890 ovaries (black). (D) Violin plot assaying the expression of non-target genes that do not  
 891 substantially change in several RNA-seq data sets including Germline Stem Cell enriched (GSC),  
 892 undifferentiated Cystoblast enriched (CB), and differentiating cyst enriched (Cyst), young WT  
 893 (Young), adult (WT), unfertilized eggs (Egg), *tst* genomic mutant (*tst*), and germline *tst* RNAi (*tst*  
 894 RNAi). (E-E') *nos*GAL4 driver control and (F-F') *tst* RNAi ovarioles stained with Vasa (green) and  
 895 Phalloidin (magenta and grayscale) indicating similar levels of phalloidin staining. Scale bars are  
 896 10µm.

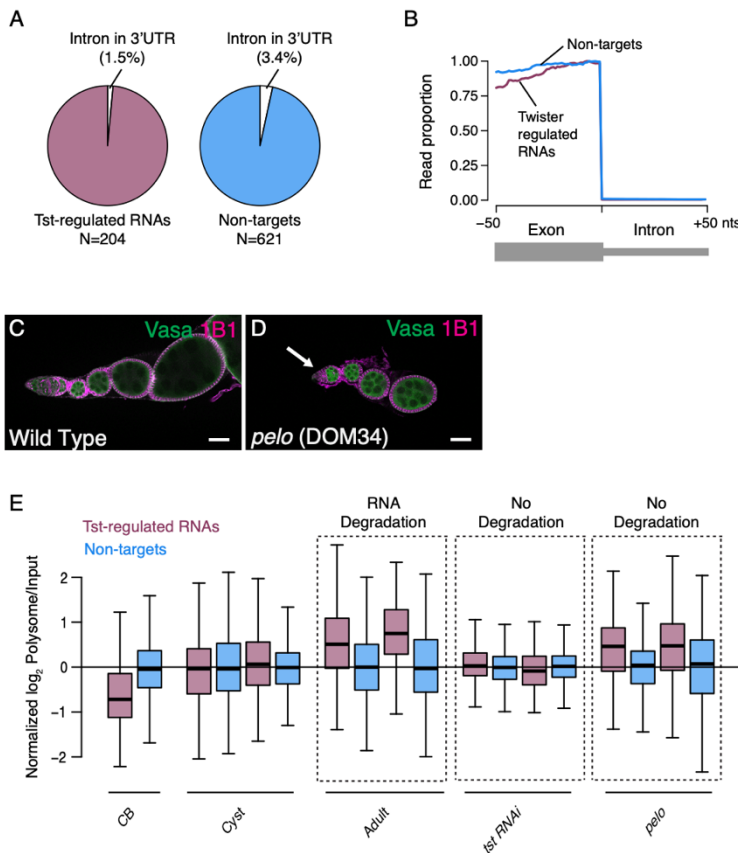

900  
 901  
 902 **Figure S3. Tst-regulated RNAs exhibit hallmarks of NGD, but not NMD.** (A) Pie graphs  
 903 showing the percent of Tst-regulated RNAs (magenta) and non-target mRNAs containing an  
 904 intron in their 3'UTR indicating that a smaller proportion of Tst-regulated RNAs contain an intron  
 905 in their 3'UTR (1.5%) compared to non-target RNAs (3.4%). (B) Metaplots showing the proportion  
 906 of RNA-Seq coverage mapping to exon-intron boundaries for both Tst-regulated targets  
 907 (magenta) and non-targets (blue) indicating that both Tst-regulated RNAs and non-target RNAs  
 908 are spliced correctly. (C) WT control and (D) *pe/lo* mutant ovarioles stained with Vasa (green) and  
 909 1B1 (magenta) indicating loss of GSC phenotype (arrow). Scale bars are 10µm. (E) Quantification  
 910 of Normalized log<sub>2</sub> polysome/input mRNA of Tst-regulated RNAs (magenta), and non-targets



911 (blue) in CB, cyst, adult, *tst RNAi* and *pelo* samples indicating that ribosome association of Tst-  
912 regulated RNAs is dynamic during development, but not for non-target RNAs.  
913  
914

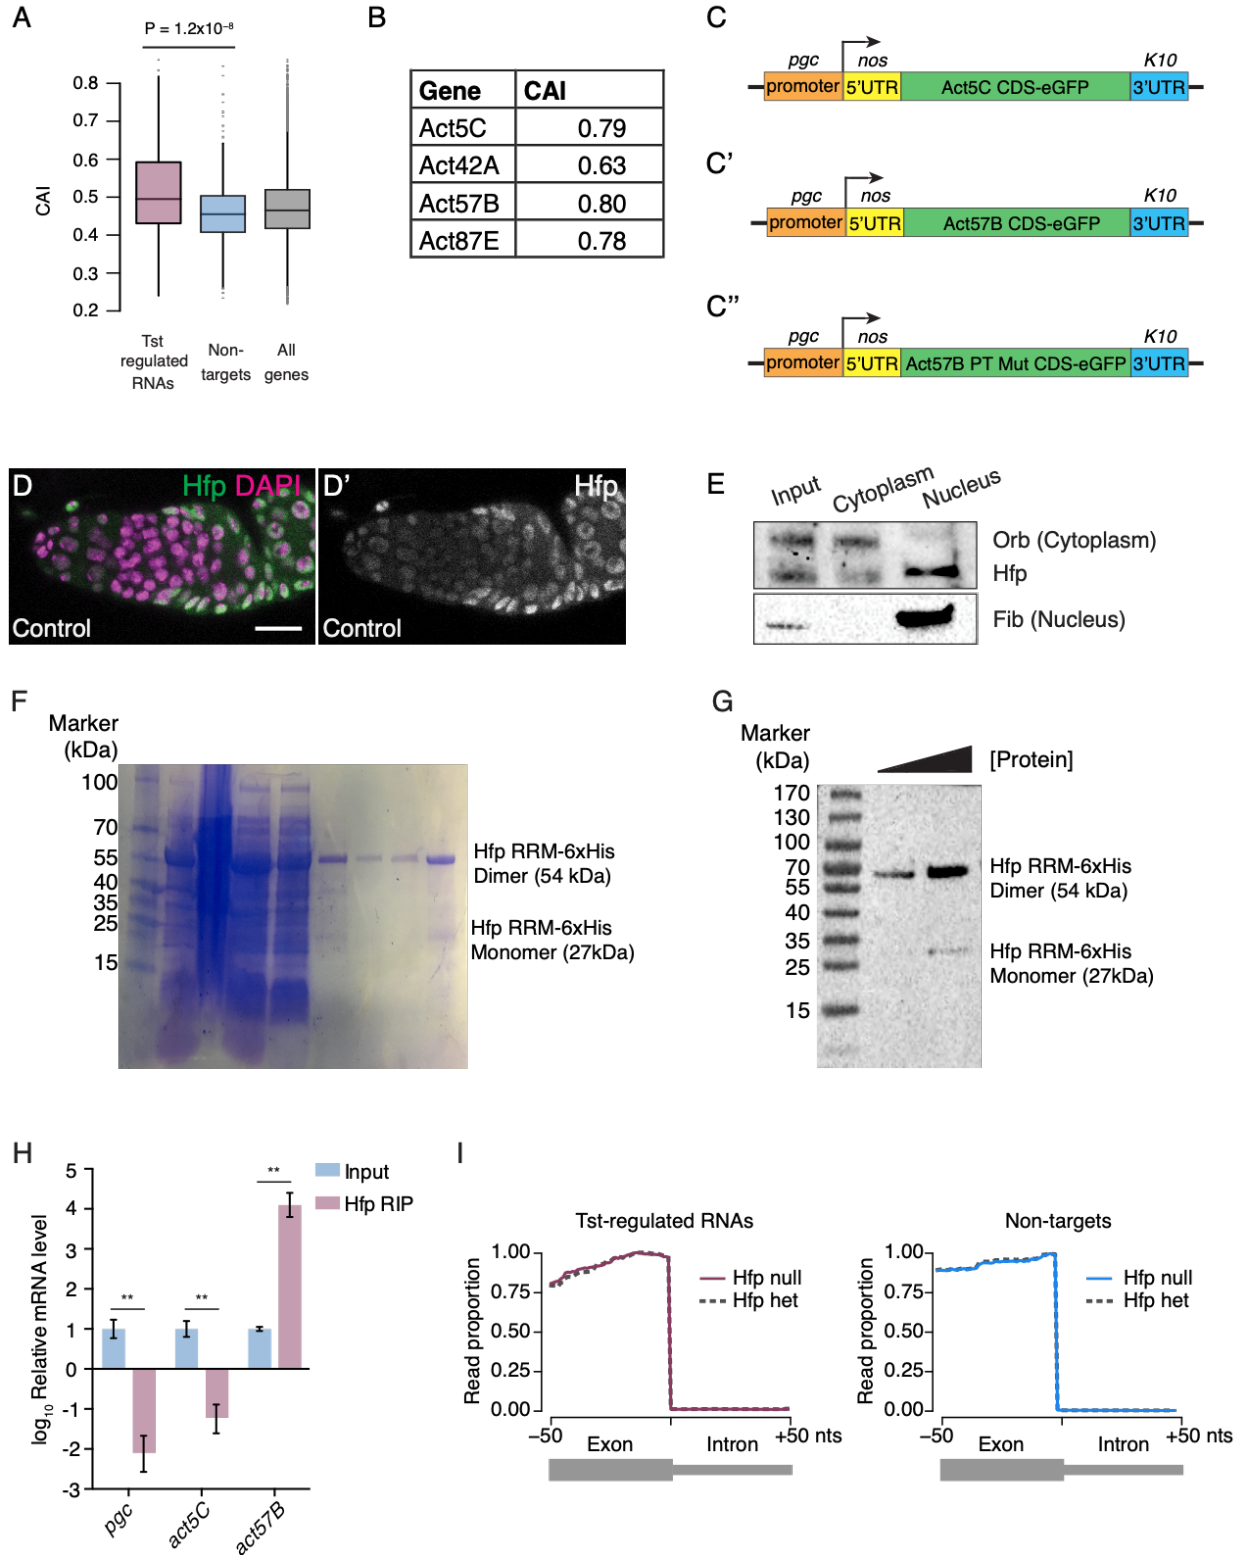

915  
916  
917  
918

**Figure S4. Tst-regulated RNAs are bound by Hfp and do not exhibit suboptimal codon usage.** (A) Codon Adaptation Index (CAI) comparison for Tst-regulated RNAs (magenta) versus

919 non-targets (blue) indicating a higher CAI for Tst-regulated RNAs (Wilcoxon rank sum test); and  
 920 all genes (gray). (B) Table of the Actin paralog genes and their respective CAI values indicating  
 921 that they are all very similar. (C) Schematic of the *act5C::GFP*, (C') *act57B::GFP* and (C'') *act57B*  
 922 *PT Mutant::GFP* reporters under the control of a germline promoter (*pgc*) and 5'UTR (*nos*), and  
 923 a neutral 3'UTR (*K10*). (D-D') Control germaria stained for Hfp (green and grayscale) and DAPI  
 924 (magenta) indicating cytoplasmic Hfp expression during early oogenesis. (E) Subcellular  
 925 fractionation Western blot analysis of input, cytoplasm and nucleus for Hfp, Orb and Fibrillarin  
 926 indicating that Hfp is present in both the nucleus and cytoplasmic fractions. (F) SDS-PAGE of a  
 927 protein marker (lane 1), bacterial supernatant (lane 2), pellet (lane 3), washes (lanes 4-6), and  
 928 elutions (lanes 7-9) of the Hfp-RRM protein purification process. (G) Western blot analysis of the  
 929 Hfp-RRM 6X-His Tag showing both monomer and dimer bands. (H) Hfp-HA RIP and qRT-PCR  
 930 analyses indicating a de-enrichment of non-target *pgc* and *act5C* levels and an enrichment of  
 931 target *act57B* levels in Hfp RIP samples compared to input (*pgc* Input vs Hfp-IP n=2, p<0.008,  
 932 *act5C* Input vs Hfp-IP n=2, p<0.005, *act57B* Input vs Hfp-IP n=2, p<0.005, Error bars are standard  
 933 error of the mean (SEM), Student's t-Test). (I) Metaplot of the proportion of RNA-seq coverage  
 934 mapping to exon-intron boundaries in *hfp* mutant and control (heterozygous) RNA-seq data sets  
 935 for both Tst-regulated RNAs (magenta) and non-targets (blue) indicating correct splicing in both  
 936 samples. Scale bars are 10µm.  
 937  
 938  
 939  
 940

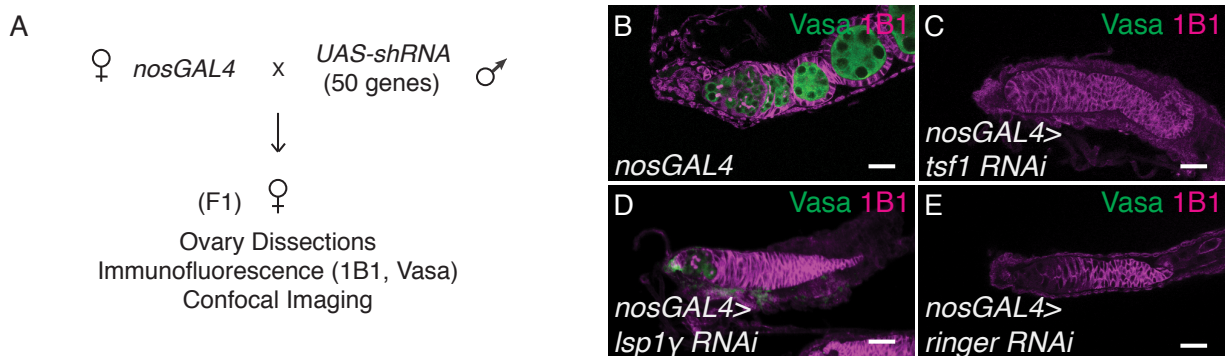

941  
 942 **Figure S5. A subset of Tst-regulated RNAs are required for oogenesis.** (A) Schematic of the  
 943 germ line RNAi knockdown screen of Tst-regulated genes. 50 Tst-regulated genes were  
 944 individually depleted by RNAi in the germline by the *UAS-GAL4* system and *nosGAL4* driver. F1  
 945 ovaries were dissected and phenotypes were assessed by 1B1 and Vasa staining and confocal  
 946 imaging. (B) *nosGAL4* driver control, (C) *tsf1 RNAi*, (D) *lsp1γ RNAi*, and (E) *ringer RNAi*  
 947 stained with Vasa (green) and 1B1 (magenta) each exhibiting a complete loss of germ line. Scale bars  
 948 are 10µm.

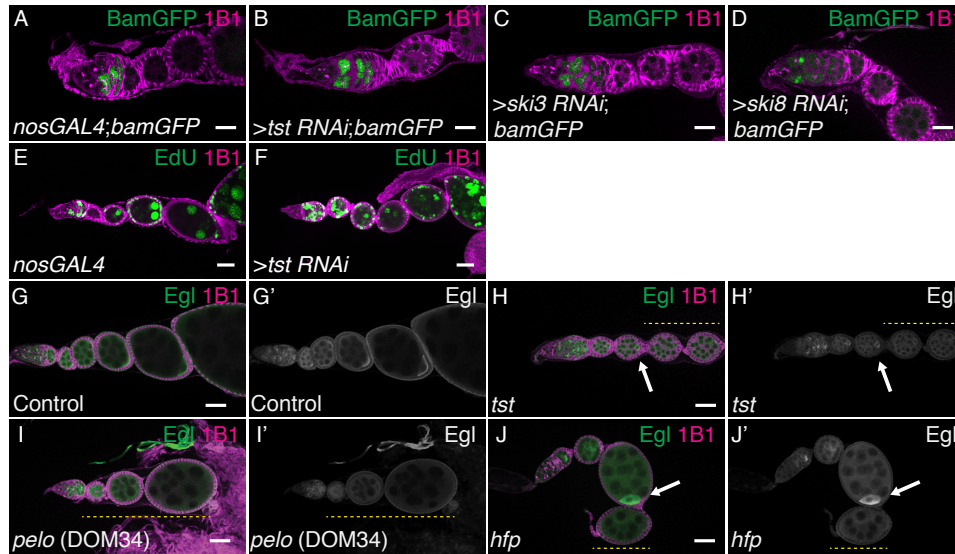

949  
950 **Figure S6. Tst is required for maintaining oocyte fate during oogenesis.** (A)  
951 *nosGAL4;bamGFP* driver control ovariole, (B) *>tst RNAi;bamGFP*, (C) *>ski3 RNAi;bamGFP*, and  
952 (D) *>ski8 RNAi;bamGFP* ovarioles stained with 1B1 (magenta) and GFP (green) indicating  
953 appropriate *bamGFP* expression for all samples in the differentiating cells. (E) *nosGAL4* driver  
954 control and (F) *>tst RNAi* ovarioles stained for EdU (green) and 1B1 (magenta) indicating that  
955 endocycling is occurring properly. Scale bars are 10 $\mu$ m. (G-G') WT control, and (H-H') *tst RNAi*  
956 ovarioles stained with 1B1 (magenta) and Egl (green and grayscale) showing initial localization  
957 of Egl (arrow) and subsequent loss of Egl accumulation in *tst RNAi* ovarioles (yellow dashed line).  
958 (I-I') *pelo* (DOM34) and (J-J') *hfp* mutant ovarioles stained with 1B1 (magenta) and Egl (green and  
959 grayscale) showing initial Egl localization (arrow) and subsequent loss of Egl accumulation (yellow  
960 dashed lines).
